1 TITLE: Agricultural and geographic factors shaped the North American 2015 highly pathogenic  
2 avian influenza H5N2 outbreak

3 SHORT TITLE: Agricultural and geographic factors of the 2015 HPAI US Outbreak

4 AUTHORS: Joseph T. Hicks<sup>1</sup>, Dong-Hun Lee<sup>2</sup>, Venkata R. Duvuuri<sup>1</sup>, Mia Kim Torchetti<sup>3</sup>, David  
5 E Swayne<sup>4</sup>, Justin Bahl<sup>1,5</sup>

6

7 AUTHOR AFFILIATIONS: <sup>1</sup>Center for Ecology of Infectious Diseases, Department of  
8 Infectious Diseases, College of Veterinary Medicine, University of Georgia, Athens, Georgia,  
9 United States; <sup>2</sup>Department of Pathobiology and Veterinary Science, the University of  
10 Connecticut, Storrs, Connecticut, United States; <sup>3</sup>U.S. Department of Agriculture, Ames, Iowa,  
11 United States; <sup>4</sup>Exotic and Emerging Avian Viral Diseases Research Unit, U.S. National Poultry  
12 Research Center, Agricultural Research Service, U.S. Department of Agriculture, Athens,  
13 Georgia, United States; <sup>5</sup>Duke-NUS Graduate Medical School, Singapore.

14 CORRESPONDING AUTHORS:

15 Justin Bahl, [justin.bahl@uga.edu](mailto:justin.bahl@uga.edu)

16 KEYWORDS: highly pathogenic avian influenza, phylogenetics, phylodynamics, avian disease,  
17 Bayesian inference, coalescent models, discrete trait evolution, generalized linear model

18

19 ABSTRACT

20 The 2014 – 2015 highly pathogenic avian influenza (HPAI) H5N2 outbreak represents the  
21 largest and most expensive HPAI outbreak in the United States to date. Despite extensive  
22 traditional and molecular epidemiological studies, factors associated with the spread of HPAI  
23 among midwestern poultry premises remain unclear. To better understand the dynamics of this  
24 outbreak, 182 full genome HPAI H5N2 sequences isolated from commercial layer chicken and  
25 turkey production premises were analyzed using evolutionary models modified to incorporate  
26 epidemiological and geographic information. Epidemiological compartmental models  
27 constructed in a phylogenetic framework provided evidence that poultry type acted as a barrier to  
28 the transmission of virus among midwestern poultry farms. Furthermore, after initial  
29 introduction, a continuous external source of virus was not needed to explain the propagation of  
30 HPAI cases within the commercial poultry industries. Discrete trait diffusion models indicated  
31 that within state viral transitions occurred more frequently than inter-state transitions. Distance,  
32 road density and proportion of water coverage were all supported as associated with viral  
33 transition between county groups (Bayes Factor > 3.0). Together these findings indicate that the  
34 midwestern poultry industries were not a single homogenous population, but rather, the outbreak  
35 was shaped by poultry sectors and geographic factors.

36 AUTHOR SUMMARY

37 The highly pathogenic avian influenza outbreak among poultry farms in the midwestern United  
38 States appears to be influenced by agricultural and geographic factors. After initial introduction  
39 of the virus into the poultry industries, no further introductions (such as from a wild bird  
40 reservoir) were necessary to explain the continuation of the outbreak from March to June 2015.  
41 Additionally, evidence suggests that proximity increases the chances of viral movement between

42 two locations. While many hypotheses have been proposed to explain the transmission of virus  
43 among poultry farms, the support for road density as an important driver of viral movement  
44 suggests human-mediated viral transportation played a key role in the spread of the highly  
45 pathogenic H5N2 outbreak in North America.

## 46 INTRODUCTION

47           In 2014, a novel reassortant highly pathogenic avian influenza (HPAI) H5N8 virus of the  
48 hemagglutinin (HA) clade 2.3.4.4 was identified in South Korean poultry and wild birds and  
49 quickly spread to other Asian countries and Europe (1–3). By the end of 2014, both the Eurasian  
50 H5N8 virus and its reassortant H5N2 containing Eurasian- and North American-origin gene  
51 segments, were reported in western Canada and the United States (4–6). The ensuing 2014-2015  
52 North American HPAI outbreak marked the largest and most expensive HPAI outbreak in the  
53 United States to date (7). In late November 2014, commercial poultry flocks in British Columbia,  
54 Canada were reported to be infected with the novel reassortant HPAI H5N2 (5), soon followed  
55 by HPAI H5N8 isolation within wild birds in the United States Pacific Northwest (4). Over the  
56 next several months, sporadic infections arose in wild and domestic birds, including both  
57 commercial production and backyard poultry operations. In March 2015, a drastic increase of  
58 HPAI H5N2 cases was observed within domestic poultry in the Midwestern United States. By  
59 the end of the outbreak in June 2015, over 50.4 billion poultry died or were culled due to the  
60 outbreak, costing the US government over \$850 million, the poultry industries an estimated \$700  
61 million to \$1 billion and had a negative \$3.3 billion impact on the economy (7–9).

62           Risk factors that explain the continued transmission of HPAI between domestic poultry  
63 facilities remain unclear. For instance, previous analyses have provided conflicting evidence as  
64 to the role of wild birds in the propagation of the outbreak within the midwestern poultry  
65 industries. Despite frequent reports of wild birds on the grounds and within barns of HPAI-  
66 positive turkey premises (10), a case-control study found no significant difference in exposure to  
67 wild birds between positive turkey premises and matched controls (11). Similarly, one  
68 phylodynamic analysis found no evidence of continued HPAI introductions into the midwestern

69 poultry industries (12), but other models have suggested multiple introductions (13,14).  
70 Geographic and environmental variables, such as human population, agricultural, climatological,  
71 and ecological measures, may help explain farm-to-farm transmission observed within the  
72 poultry industries. For example, proximity between midwestern poultry premises has been  
73 implicated as an important risk factor for HPAI infection (11,13). Although it has been suggested  
74 that poultry production type did not affect outbreak transmission (12), this has not been formally  
75 tested. Despite extensive molecular epidemiological studies, such environmental and ecological  
76 covariates of viral spread during this outbreak have not been investigated.

77         Direct epidemiological links between most poultry premises have not been established  
78 (15), limiting the ability to investigate risk factors that facilitated HPAI transmission among  
79 poultry farms. The incorporation of pathogen genetic sequence data into epidemiological  
80 investigations can elucidate network connections between infectious entities, be that individual  
81 hosts or populations, such as poultry farms. One approach is viral phylodynamic modeling, ie.  
82 the integration of epidemiological and evolutionary models to explore viral ecological dynamics.  
83 Based on the assumption that viral epidemiology and evolution occur on the same time scale,  
84 viral phylodynamic modeling can reveal underlying population structure and epidemiological  
85 parameters. Recent incorporation of generalized linear models (GLM), a family of commonly  
86 used regression methods, into Bayesian phylogenetic frameworks have enabled investigation into  
87 the impact of ecological factors on the geographic diffusion of viral pathogens (16,17). Through  
88 such an approach, factors associated with HPAI movement within United States poultry  
89 industries can be identified, informing future control efforts.

90         In this study, we integrated epidemiological and ecological parameters with genomic  
91 sequence data collected contemporaneously with the midwestern poultry industries HPAI

92 outbreak to formally test outstanding hypotheses. Whole genome HPAI H5N2 sequence data  
93 isolated from layer chicken and turkey premises were analyzed using evolutionary model-based  
94 techniques. First, we developed population models to test the importance of poultry sector  
95 divisions (i.e. layer chicken vs turkey industries) and external viral introductions from an  
96 unsampled avian population in the propagation of the outbreak. Second, we evaluated ecological  
97 predictors of geographic diffusion of virus among midwestern counties to help identify  
98 environmental and human variables associated with viral transmission. Together, these analyses  
99 use information that accumulated within the HPAI H5N2 genome during the outbreak to help  
100 decipher higher-order patterns of viral dispersal among commercial poultry farms.

## 101 RESULTS

### 102 *HPAI H5N2 Evolution within Domestic Poultry*

103 182 full genome HPAI H5N2 genetic sequences, each representing a single commercial  
104 poultry farm operation across 49 counties in six states (Iowa, Minnesota, Nebraska, North  
105 Dakota, South Dakota, and Wisconsin), were included in the present analysis. The sequences  
106 were isolated from samples collected between March 25 and June 15, 2015 from positive turkey  
107 premises (72.5%) and layer chicken farms (27.5%). Two molecular clock assumptions and three  
108 “traditional” coalescent models (i.e., constant population, exponential growth, and extended  
109 Bayesian skyline plot [EBSP]) were compared with marginal likelihood estimation (MLE) to  
110 evaluate the underlying population and evolutionary dynamics of the 2015 HPAI outbreak. The  
111 highly flexible EBSP coalescent with a strict molecular clock assumption had the best fit for the  
112 included sequence data ( $\log(\text{MLE}) = -25884.06$ ). The supported molecular clock assumption  
113 varied depending on the coalescent model employed. Statistical support between the relaxed and  
114 strict molecular clock assumptions was ambivalent for the constant and exponential coalescent

115 models (log Bayes factor of relaxed compared to strict molecular clock ( $\log BF_{R-S}$ ) = 0.06 and -  
116 0.3, respectively; Fig 1A). Stronger evidence for the strict clock was observed when the EBSP  
117 coalescent was implemented ( $\log BF_{R-S}$  = -4.45). Similarity between molecular clocks was also  
118 demonstrated by the limited impact of the molecular clock assumptions on phylogenetic tree  
119 parameter estimates such as evolutionary rate and time to the most recent common ancestor  
120 (TMRCA; Fig 1B and 1C). For example, under the EBSP coalescent, the relaxed mean clock rate  
121 was  $6.84 \times 10^{-3}$  substitutions per site per year (95% highest posterior density (HPD):  $6.09 \times 10^{-3}$  -  
122  $7.59 \times 10^{-3}$ ) compared to the strict clock rate estimate of  $6.77 \times 10^{-3}$  substitutions per site per year  
123 (95% HPD:  $5.98 \times 10^{-3}$  -  $7.56 \times 10^{-3}$ ). In contrast, selection of the coalescent model influenced the  
124 TMRCA of the included sequences. Under the strict molecular clock, EBSP coalescent models  
125 estimated the TMRCA as March 1, 2015 (95% HPD: February 16 to March 10, 2015) while the  
126 remaining traditional coalescent models had a TMRCA at least two weeks earlier (Fig 1C).

127

128 Fig 1. Evolutionary history of HPAI H5N2 isolated from commercial poultry premises, 2015.

129 (A) Bayes factor (BF) tests between molecular clock and coalescent evolutionary models.  
130 For each coalescent model (exponential growth [Expo] and extended Bayesian skyline  
131 plot [EBSP]), BF was calculated using the constant coalescent model as reference (Const,  
132 indicated with asterisk) under the same molecular clock model. Two horizontal gray  
133 reference lines denote  $\log(BF) = 1$  and  $\log(BF) = 5$ , which represent support and very  
134 strong support, respectively, for improved fit over the reference. (B) Molecular clock rate  
135 (substitutions per site per year) comparison between molecular clock and coalescent  
136 evolutionary models. (C) The estimated time of the most recent common ancestor  
137 (TMRCA; decimal year) compared between molecular clock and coalescent evolutionary

138 models. (D) Maximum clade credibility tree representing the ancestral reconstruction of  
139 poultry industry (layer chicken vs. turkey) across the evolutionary history of the outbreak.  
140 The ancestral reconstruction assumed an EBSP coalescent and strict molecular clock  
141 evolutionary model. Tree branches are colored based on the most probable poultry  
142 industry of the descendant node. Thin gray node bars represent the 95% highest posterior  
143 density (HPD) of the node height (i.e., the time at which that ancestor is estimated to have  
144 existed).

145

#### 146 *H5N1 H5N2 Host Dispersion and Population Dynamics*

147 To explore the extent of viral dispersal between poultry industries, multiple phylogenetic-  
148 based methods were performed: the structured coalescent, the discrete trait diffusion model, and  
149 epidemiologic compartmental model-based coalescent. Each of these methods estimate a  
150 different approximation for the dispersal of virus between populations. The structured coalescent  
151 treats layer chicken premises and turkey premises as separate population demes between which  
152 virus was allowed to “migrate,” and thus estimates a *migration rate* between the two demes. In  
153 contrast, discrete trait diffusion models treat the trait of interest (here, poultry industry) as a  
154 characteristic that evolves over time, inferring a *transition rate*, analogous to a nucleotide  
155 substitution model. Finally, compartmental models enable the calculation of *transmission rates*  
156 between the two poultry compartments. Although all approximate the amount of viral dispersal  
157 among the poultry industries, each measure is calculated differently with unique assumptions and  
158 so are referred to by a particular term. All methods estimated that viral dispersal from layer  
159 chicken premises to turkey premises occurred more frequently than from turkey premises to  
160 layer chicken (Supplemental Table S1). In the structured coalescent, the migration rate from



161 layer chicken to turkey premises was much greater than the reverse (migration rate from  
162 chickens to turkeys: 12.6, 95% HPD: 6.2 – 18.7; migration rate from turkeys to chickens: 0.7,  
163 95% HPD: 0.00001 – 2.2). The transition rates between the poultry industries estimated from the  
164 discrete trait diffusion model were much more similar to each other (transition rate from  
165 chickens to turkeys: 1.4, 95% HPD: 0.04 – 3.9; transition rate from turkeys to chickens: 0.3, 95%  
166 HPD: 0.003 – 0.9). These models suggest the dispersion of virus between poultry industries was  
167 not symmetrical, potentially indicating poultry type played a role in the outbreak dynamics.

168 To formally test this hypothesis, we used epidemiological compartmental model  
169 equations to describe the coalescent process (18). Four competing scenarios were constructed  
170 (Fig 2A). Models 1 and 2 described a homogenous poultry population that differed by the  
171 presence of a continuous external viral source in Model 2. In contrast, Models 3 and 4 described  
172 a host population stratified by poultry production system, again differing based on an external  
173 viral source in Model 4. It should be noted that due to the sampling scheme of genetic sequences  
174 (one HPAI whole genome sequence per infected premises), the epidemiologic unit of interest  
175 was the premises (or farm), and not the individual bird. That is, findings of the compartmental  
176 models should be interpreted on the farm-to-farm scale, not the dynamics of transmission  
177 between individual birds. Akaike's information criteria for Markov chain Monte Carlo (AICM)  
178 calculated from the posterior sample of structured tree likelihood estimates revealed that Model 3  
179 provided the best fit for the data under both strict and relaxed molecular clock assumptions  
180 (AICM under strict clock = 330.1; under relaxed clock = 376.3; Fig 2B, Supplemental Table S2).  
181 This suggests the midwestern portion of the 2015 HPAI outbreak was isolated from external  
182 sources but most likely structured by poultry production system. Four transmission rates were  
183 estimated for Model 3 to describe the interaction between the layer chicken and turkey

184 populations: two within-poultry system rates ( $\beta_T$  and  $\beta_C$ ) and two between-poultry system rates  
185 ( $\beta_{TC}$  and  $\beta_{CT}$ ). The model estimated the transmission rates within the turkey production system to  
186 be highest ( $\beta_T = 11.6$ , 95%HPD: 2.0 – 22.0), followed by transmission rates from chicken farms  
187 to turkey farms ( $\beta_{CT} = 4.9$ , 95% HPD: 0.6 – 9.6). The lowest transmission rate was estimated  
188 from turkey farms to chicken farms ( $\beta_{TC} = 0.1$ , 95% HPD: 0.02 – 0.22). This is similar to the  
189 results of the structured coalescent model and discrete trait model described above  
190 (Supplemental Table S1). Infectious period of a farm also varied substantially between the two  
191 production systems. A HPAI-positive turkey premises was estimated to remain infectious for 5.7  
192 days (95% HPD: 4.3 – 10.5), whereas layer chicken premises were estimated to remain  
193 infectious for 32.1 days (95% HPD: 22.4 – 49.3; Fig 2C).

194

195 Fig 2. Comparison of hypothesized HPAI H5N2 epidemiological compartmental models. (A)

196 Each compartmental model represents a Susceptible-Infectious-Removed (SIR) model

197 with varied population heterogeneity: 1) a single, closed, homogenous population, 2) a

198 single, homogenous population with a continual external source of virus (U), 3) a closed

199 population, stratified by poultry system (turkeys (T) and layer chickens (C)), and 4) the

200 stratified population with a continual external source of virus. (B) Compartmental model

201 fit for the midwestern highly pathogenic avian influenza (HPAI) H5N2 outbreak, 2015.

202 Akaike's information criteria for Markov chain Monte Carlo (AICM) calculated based on

203 the posterior distribution of the structured tree likelihood was used to evaluate the relative

204 model fit for the four assessed compartmental models under differing molecular clock

205 assumptions. Under both molecular clocks, Model 3 provided the best model fit. (C)

206 Estimated infectious period of layer chicken and turkey farms during the 2015 midwestern

207 highly pathogenic avian influenza (HPAI) H5N2 outbreak. During model specification, an  
208 informative prior was provided for the Bayesian process. This prior probability  
209 distribution was based on the reported average time from HPAI confirmation to  
210 depopulation plus 5 days to allow for delay between infection and HPAI confirmation.  
211 Model 3 estimated the infectious period for layer chickens to be longer than expected  
212 given the prior information.

213

#### 214 *Ecologic Predictors of HPAI H5N2 Geographic Diffusion*

215 Using the posterior distribution of phylogenetic trees estimated under the EBSP  
216 coalescent and strict molecular clock assumptions, discrete trait diffusion models were estimated  
217 to describe the geographic dispersal of HPAI H5N2 throughout the midwestern United States.  
218 County of origin was used as the basis to categorize the 182 sequences. Counties were grouped  
219 based on their state and whether sequences within the county exclusively originated from  
220 commercial turkey premises. For example, Iowan counties with only turkey cases were grouped  
221 separately from Iowan counties which had at least one layer chicken case. County groups with  
222 only turkey cases are henceforth referred to as turkey-exclusive while county groups with at least  
223 one layer chicken case are referred to as mixed poultry. The complete ancestral reconstruction of  
224 the midwestern outbreak is shown in Fig 3A. The three largest transition rates were observed  
225 between county groups within the same state, particularly Minnesota and Iowa (Fig 3B;  
226 Supplemental Table S3). The most frequent transitions occurred from Minnesota mixed poultry  
227 counties to Minnesota turkey-exclusive counties (median rate: 3.3 transitions per year; 95% HPD  
228 0.7 – 6.4; BF = 490.6). In Minnesota, the reverse rate (i.e., from turkey-exclusive counties to  
229 mixed poultry counties) was also decisively supported with a relatively high transition rate (2.3

230 transitions per year; 95% HPD: 0.6 – 4.6; BF = 2,007.1). The second most frequent transition  
231 had the highest statistical support and occurred from Iowan mixed poultry counties to Iowan  
232 turkey-exclusive counties (3.3 transitions per year; 95% HPD 1.4 – 5.7; BF = 28,139.6). Three  
233 inter-state transitions were also decisively supported, but less frequent. These transitions were  
234 estimated from Iowa mixed-poultry counties to Minnesota turkey-exclusive counties (0.9  
235 transitions per year; 95% HPD 0.2 – 2.2; BF = 14,068.3), from Minnesota turkey-exclusive  
236 counties to Wisconsin turkey-exclusive counties (0.74 transitions per year; 95% HPD 0.1 – 1.8;  
237 BF = 202.3) and from Wisconsin turkey-exclusive counties to Iowan mixed-poultry counties (0.9  
238 transitions per year; 95% HPD 0.01 – 2.6; BF = 134.8). All supported transition rates (BF > 3.0)  
239 were found either within a state or between states that share borders, except for a single weakly  
240 supported rate from South Dakota turkey counties to Wisconsin mixed poultry counties (0.6  
241 transitions per year; 95% HPD 0.0002 – 2.1; BF = 3.2). This suggests geographic distance  
242 influences the dispersal of HPAI H5N2 among midwestern counties.

243

244 Fig 3. Discrete trait diffusion model of HPAI H5N2 among midwestern county groups. (A)

245 Maximum clade credibility tree representing the ancestral reconstruction of county groups  
246 across the evolutionary history of the outbreak. The ancestral reconstruction was based on  
247 an EBSM coalescent and strict molecular clock evolutionary model. Tree branches are  
248 colored based on the most probable county group of the descendant node. Thin gray node  
249 bars represent the 95% highest posterior density (HPD) of the node height (i.e., the time at  
250 which that ancestor is estimated to have existed). (B) Diffusion rate summary among  
251 county groups. County groups were defined based on state and composition of host type  
252 within the county. Counties with only turkey cases (turkey exclusive; T) were grouped

253 separately from counties with at least one layer chicken case (mixed poultry; C). Arrows  
254 represent transition rates with strong support (Bayes factor > 10) with arrow thickness  
255 proportional to the magnitude of transition rate. (C) Conditional effect size of  
256 environmental and geographic covariates within the generalized linear model (GLM).  
257 Conditional effect size represents the effect size of the variable coefficient given inclusion  
258 in the GLM. Supported covariates (Bayes factor > 3) are bolded. Covariates are ordered  
259 by Bayes factor. The dashed gray line represents a conditional effect size of 0, signifying  
260 little impact of the covariate on viral dispersal.

261  
262 The discrete trait diffusion model was extended with a GLM that assessed the impact of  
263 distance and other environmental variables on the transition rates among the defined county  
264 groups. County characteristics for the 9 modeled variables are summarized in Table 1. On  
265 average, county centers were 266 km apart, ranging from 30 to 862 km. HPAI-positive counties  
266 had a higher density of layer chicken farms (0.02 farms/km<sup>2</sup>) than turkey farms (0.004  
267 farms/km<sup>2</sup>). Counties also had a broad range of human population density ranging from about 1  
268 to 58 people/km<sup>2</sup>. Of the 9 variables included in the GLM, three were statistically supported to  
269 be associated with diffusion of HPAI H5N2 among county groups (Fig 3C, Supplemental Table  
270 S4). Distance between county group centroid was decisively supported to be negatively  
271 associated with transition between two groups (log conditional effect size = -1.0; 95% HPD -1.2,  
272 -0.8; BF = 216,262.9). In other words, viral transitions are less likely between county groups that  
273 are separated by a greater distance. Road density of the origin county group was positively  
274 associated with viral dispersion (log conditional effect size = 1.2; 95% HPD 0.6 – 1.7; BF =  
275 42.8). That is, county groups with a higher density of roads were associated with higher

276 dispersion rates to other county groups. The proportion of the destination county group covered  
 277 with water was only weakly supported for inclusion in the GLM (log conditional effect size =  
 278 0.6; 95% HPD 0.2 – 0.9; BF = 3.9).

279

280 Table 1. Demographic and geographic characteristics of the 49 United States counties with  
 281 HPAI-positive commercial poultry premises during the H5N2 outbreak, 2015.

|                                                          | <b>Mean</b> | <b>Standard<br/>Deviation</b> | <b>Minimum</b>        | <b>Maximum</b> |
|----------------------------------------------------------|-------------|-------------------------------|-----------------------|----------------|
| <b>Distance between counties (km)</b>                    | 265.95      | 153.45                        | 30.18                 | 861.99         |
| <b>Layer Chicken Farm Density (farms/km<sup>2</sup>)</b> | 0.02        | 0.02                          | 0.001                 | 0.09           |
| <b>Turkey Farm Density (farms/km<sup>2</sup>)</b>        | 0.004       | 0.004                         | 3.97x10 <sup>-6</sup> | 0.01           |
| <b>Human Population Density (humans/km<sup>2</sup>)</b>  | 12.53       | 11.21                         | 1.39                  | 58.07          |
| <b>Road Density (km/km<sup>2</sup>)</b>                  | 1.89        | 0.32                          | 1.18                  | 2.78           |
| <b>Water Coverage (%)</b>                                | 1.56        | 2.21                          | 0.02                  | 11.34          |
| <b>Important Bird Area (%)</b>                           | 4.23        | 7.60                          | 0.0                   | 30.96          |
| <b>Agricultural Land Use (%)</b>                         | 78.07       | 13.28                         | 32.46                 | 90.62          |
| <b>Frozen days</b>                                       | 19.82       | 4.93                          | 12                    | 38             |

282

283

## 284 DISCUSSION

285 Our exploration of population models to describe the 2015 midwestern United States  
 286 HPAI H5N2 outbreak provides evidence that upon entering the midwestern poultry industries, no  
 287 further viral introductions from outside sources were needed to explain the observed  
 288 epidemiological trajectory. Furthermore, the statistical support for a stratified poultry population  
 289 suggests that poultry industries should not be considered a homogenous host population for viral  
 290 pathogens. This is also supported by the discrete trait diffusion analyses, which demonstrate that  
 291 geographic factors influence viral dispersion among counties, indicating heterogeneity among  
 292 geographic locations. Multiple factors including poultry production system barriers and

293 geographic characteristics appear to have influenced the course of the outbreak within poultry  
294 industries.

295 In our analysis, the EBSP coalescent model had better support than the other traditional  
296 coalescent models in terms of model fit. This is most likely a reflection of EBSP's flexibility, i.e.  
297 the piece-wise nature of this method, which facilitates the identification of complex population  
298 changes. Coalescent theory has been a popular technique to infer population demographics  
299 underlying viral outbreaks (19–28). By relating effective population size to the rate at which  
300 phylogenetic lineages converge backwards in time, the coalescent has become a powerful tool to  
301 infer demographic changes even in the face of incomplete sampling. Traditionally, the estimation  
302 of the coalescent process required rigid prior assumptions in the form of simplistic mathematical  
303 growth functions (e.g., constant population size or exponential growth). To better reflect  
304 biological reality, methods have been developed that incorporate more flexibility than a one to  
305 two parameter mathematical function (29,30). For instance, the EBSP assumes demographic  
306 changes follow a smoothed, piece-wise, linear function whose change points are inferred from  
307 the sequence data (31). To date, mathematical methods to incorporate population structure into  
308 EBSP coalescent models have not been developed even though population structure has been  
309 observed to confound EBSP estimates (32).

310 Despite the flexibility of EBSP, compartmental-based coalescent models are worth  
311 assessing as they allow for direct incorporation and hypothesis testing of specific population  
312 structures. Rather than the non-parametric, piece-wise approach of EBSP, the prior mathematical  
313 functions assumed are ordinary differential equations (ODEs) constructed from the specification  
314 of epidemiological compartmental models. It is the parameters of these ODEs that are fit during  
315 the Markov chain Monte Carlo (MCMC) process. Among the four analyzed compartmental

316 models, we found that the closed, stratified population provided the best fit for the sequence data,  
317 suggesting layer chickens and turkeys represented two separate host populations that interacted  
318 with each other, but did not receive virus from a continuous external source. Interestingly, when  
319 only observing the single homogenous population models (Models 1 and 2), the inclusion of an  
320 external viral source (Model 2) improves model fit compared to the closed population model  
321 (Model 1). Once the population structure of poultry type is included (Models 3 and 4), the closed  
322 population model provides a better fit than that with continual viral introductions. This  
323 observation underlines the importance of including population heterogeneity within evolutionary  
324 demographic models to explain observed viral diversity and population dynamics.

325 To help improve identifiability of the remaining parameters within the compartmental  
326 model, expected prior distributions for the infectious period of affected premises were specified  
327 based on reported USDA data (7). Despite the informative assumption, the infectious period of  
328 layer chicken farms was estimated to be longer than expected. In our model, we assumed a 5-day  
329 period between the onset of infectivity of the farm and reporting of HPAI infection. Delays in the  
330 identification and/or reporting of HPAI infection could result in infectious periods that begin  
331 well before the assumed 5 days. Continued infectivity beyond the completion of flock  
332 depopulation is another likely contributor to prolonged infectious periods. Although commercial  
333 poultry depopulation occurred on average 6.4 days after National Veterinary Services Laboratory  
334 (NVSL) HPAI confirmation, premises were not considered to be virus-free until, on average,  
335 87.7 days following confirmation (7). In either case, our models suggest layer chicken farms  
336 remained infectious for much longer than turkey farms, potentially explaining why the  
337 transmission rate from chicken farms to turkey farms was higher than its counterpart. In fact,  
338 regardless of the model (i.e., structured coalescent, discrete trait diffusion model, or



339 compartmental model), layer chicken farms played a more central role to viral transmission than  
340 turkey farms during the outbreak. This may seem contradictory to experimental evidence that  
341 demonstrated the HPAI H5N2 virus had longer mean death times in turkeys (5 – 6 days)  
342 compared to chickens (2 – 3 days (33)). However, such experimental infections only describe  
343 transmission information on the individual bird scale, rather than the farm-to-farm transmission  
344 scale captured in this analysis. Although it may be that individual turkeys survive longer, in  
345 practice turkey premises were quicker to be depopulated, resulting in a shorter farm-level  
346 infectious period compared to chicken farms. Because intervention (i.e. depopulation) was  
347 performed on the farm level, individual-level infectious periods alone are not adequate to  
348 describe the overall observed outbreak dynamics.

349         The implementation of a GLM into a Bayesian discrete trait analysis has been previously  
350 applied to HPAI in China (34) and Egypt (35), providing evidence that environmental,  
351 agricultural and anthropogenic factors influence viral movement. Due to differences in social,  
352 governmental and agricultural systems, the generalization of these previous GLM results to other  
353 countries may not be appropriate. Instead, these studies provide a framework to identify  
354 epidemiological covariates of the North American HPAI H5N2 outbreak. Our results indicate  
355 that distance and road density are key factors that influenced the geographic spread of HPAI  
356 H5N2 among midwestern counties in the spring of 2015. A recent spatial modeling analysis  
357 revealed that HPAI spread among Minnesota poultry premises was heavily distance-dependent  
358 during the 2015 outbreak (13). Our results support this claim by providing evidence that the  
359 frequency of shared viral diversity increases as the distance between two counties decreases.  
360 Risk of infection due to proximity can also be observed in our discrete trait diffusion model in  
361 which within-state HPAI spread was much more frequent than inter-state spread. HPAI

362 movement between states may explain Bonney, et al.'s finding that distance-independent  
363 transmissions significantly improved the fit of their transmission kernel model (13). Although  
364 the causal relationship between the supported covariates and viral dispersal cannot be determined  
365 from our analysis, the statistical support for road density within the GLM may provide evidence  
366 for the relative importance of anthropogenic movement of virus. High road density may correlate  
367 with better logistic connectivity between farms, increasing the likelihood that an infected  
368 premises will export virus to nearby farms and counties. Road density has been associated with  
369 HPAI H5N1 outbreaks in Bangladesh (36), Thailand (37), Romania (38), Indonesia (39,40), and  
370 Nigeria (41), although high road density in these countries may reflect greater human population  
371 density and, therefore, a higher likelihood of case detection (42). Intensive commercial poultry  
372 surveillance during the 2015 outbreak and the lack of support for human population density as a  
373 covariate within our model suggest that the statistical support for road density in the dispersal of  
374 HPAI among midwestern counties may not merely be an artifact of sampling bias or  
375 confounding. The third variable associated with HPAI dispersal was the proportion of a  
376 destination county group covered by surface water. In other words, counties with a larger  
377 proportion of surface water received virus more frequently compared to those with less surface  
378 water. Surface water resources have been associated with HPAI dispersal and prevalence in  
379 China and may signify movement of virus by migrating waterfowl that stopover in lakes, rivers  
380 and wetlands (34,43). In our analysis, this variable was only weakly supported and had a  
381 relatively small effect size. Additionally, other variables that represent potential migratory  
382 stopover habitats, such as Important Bird Areas and agricultural land, were not supported within  
383 the model, suggesting that if wild birds contributed to HPAI dispersal within the Midwest, their  
384 role was limited. This further supports previous studies, which indicated that the midwestern

385 portion of the outbreak was driven by inter-farm transmission (11,12,14). Several mechanisms  
386 have been proposed to explain HPAI transmission between farms during the 2015 outbreak,  
387 including equipment sharing, personnel overlap, and aerosolization.

388         Due to the restricted number of sequences in the presented analysis, the number of  
389 variables and demographic scenarios that could be modelled was limited. This also affected the  
390 resolution of the geographic covariates that could be included within the GLM. Ideally, the  
391 environmental and agricultural characteristics of each individual farm or county would be  
392 evaluated as predictor for HPAI spread; however, the individual transition rates between 182  
393 farms or even 49 counties would be impossible to accurately estimate from the 182 sequences of  
394 this dataset. For this reason, sequences were categorized into county groups, resulting in a  
395 manageable transition rate matrix as well as permitting the summarization of environmental  
396 characteristics across a few counties rather than across an entire state.

397         Despite these limitations, our results present several implications for future HPAI  
398 surveillance and control in the United States. While wild birds may provide a means of viral  
399 dispersal across large distances and initial introduction into an area, evidence suggests the HPAI  
400 outbreak within the midwestern poultry industries could be maintained without continued  
401 introductions. In this sense, in-place biosecurity efforts may have been enough to prevent  
402 continued viral introductions from outside sources (including wild birds, backyard poultry  
403 flocks, or long-distance movement from other geographic regions), but were ineffective against  
404 local farm-to-farm transmission. For instance, it has been suggested that biosecurity factors could  
405 explain the lack of HPAI cases within the broiler chicken industry in the Midwest (44). The  
406 association of distance between and road density of county groups with HPAI dispersal suggests  
407 human transportation modes may have played an important role in dispersal of HPAI across the

408 Midwest. A better understanding of how HPAI-positive farms are logistically connected would  
409 greatly aid surveillance and control efforts. With the knowledge of how these farms share  
410 personnel and equipment, future outbreaks could be contained by disruption of the transportation  
411 network.

## 412 METHODS

### 413 *Dataset*

414 Whole genome HPAI H5N2 sequences collected, isolated and sequenced by the United  
415 States Department of Agriculture (USDA) during the 2014 – 2015 North American HPAI  
416 outbreak served as the basis for the analyzed data set. Full description of their collection and  
417 sequencing has been reported elsewhere (14). A subset of this sequence data was selected to  
418 better investigate the farm-to-farm transmission dynamics of the midwestern portion of the HPAI  
419 H5N2 outbreak. This subset was defined by the following inclusion criteria: 1) sequences  
420 isolated from commercial domestic poultry samples and 2) membership of the sequence in a  
421 phylogenetically distinct group, as determined by maximum likelihood estimation by Lee, et al  
422 (14). These viruses represented midwestern HPAI-positive poultry premises from the latter part  
423 of the outbreak, which was defined by a rapid increase in incidence within the midwestern  
424 poultry industries. As within-farm epidemiological dynamics were not of interest in this analysis,  
425 only one viral sequence per positive poultry premises was included. Viruses isolated from  
426 backyard poultry operations and wild birds were not included due to the incongruity in  
427 surveillance and sampling between these populations and the domestic poultry industries. A full  
428 list of the included sequence names and accession numbers are provided in Supplemental Table  
429 S5.

### 430 *Coalescent Model Comparison*

431 Coalescent theory provides the statistical framework to estimate population changes over  
432 time from genetic sequence data. To investigate the population dynamics of the midwestern  
433 poultry portion of the outbreak, various coalescent population model prior assumptions were  
434 implemented and compared in BEAST2 (45). Using ModelFinder (46) as implemented in the IQ-  
435 TREE software package (<http://www.iqtree.org/>), the Kimura three parameter (K3P; i.e., one  
436 transition rate and 2 transversion rates) model (47) with unequal base frequencies and a gamma  
437 distribution of rate variation among sites (48) was determined as the best fit nucleotide  
438 substitution model and was used for each BEAST2 model. All coalescent models were separately  
439 estimated under both strict and lognormally distributed, uncorrelated, relaxed molecular clock  
440 assumptions. For each BEAST2 model, at least three independent MCMC runs of 50 million  
441 chain length were initiated from random starting trees. Convergence was assessed in Tracer v1.5,  
442 ensuring an effective sample size (ESS) > 200 for each estimated parameter. If ESS < 200, the  
443 discarded burn-in fraction was increased or more MCMC runs were performed. Three  
444 “traditional” coalescent models (i.e., constant population, exponential growth, and EBSP (31))  
445 were performed to investigate demographic dynamics. Model fit was compared among the  
446 coalescent and molecular clock models with path sampling to calculate the marginal likelihood  
447 estimate (MLE) (49). Estimating the marginal likelihood enables the calculation of a Bayes  
448 Factor (BF), which is a ratio of two marginal likelihoods. A  $\log(\text{BF}) > 5$  indicates very strong  
449 statistical support for one model over the other (50). Viral dispersion between poultry industries  
450 (layer chicken vs. turkey) was initially estimated with a simple discrete trait diffusion model as  
451 well as a structured coalescent (25). The EBSP coalescent model was used as the tree prior for  
452 the discrete trait diffusion model. Both viral dispersion models were performed under both strict  
453 and relaxed molecular clock, as above.

454 A recently developed structured coalescent-based BEAST2 package (PhyDyn) was used  
455 to investigate more complex pathogen population scenarios by specifying epidemiological  
456 compartmental models (18). Four alternative compartmental models were assessed to investigate  
457 the presence of population structure by poultry type (layer chicken vs. turkey) and continual viral  
458 introductions from an unknown source population. Each compartmental model was a  
459 Susceptible-Infectious-Removed (SIR) model with varied population heterogeneity (Fig 2A): 1)  
460 a single, closed, homogenous population, 2) a closed population, stratified by poultry system, 3)  
461 a single, homogenous population with a continual external source of virus, and 4) a stratified  
462 population with a continual external source of virus. By including models with an external viral  
463 source, the models test whether this aspect of the outbreak was insulated or involved repeated  
464 introductions of HPAI from wild birds, backyard poultry, or undetected HPAI-positive premises.  
465 Since marginal likelihood estimation via path sampling has not yet been developed for the  
466 PhyDyn package, Akaike Information Criterion for MCMC (AICM) (51) was used to assess  
467 model fit and was calculated from the posterior MCMC sample of the structured tree likelihood  
468 with the R package, aicm (<https://rdrr.io/cran/geiger/man/aicm.html>).

#### 469 *Discrete trait diffusion models*

470 To estimate the impact of environmental variables on the geographic diffusion of HPAI  
471 between midwestern counties, a discrete trait diffusion model was constructed and further  
472 extended with a generalized linear model (GLM) in BEAST v1.10 (52). Discrete trait diffusion  
473 models are a phylogeographic technique in which each analyzed genetic sequence is assigned an  
474 observed characteristic trait that is assumed to have changed across the viral evolutionary history  
475 in a continuous time Markov chain process (53). Transition rates among these observed traits can  
476 then be inferred. In this analysis, the discrete character trait definition was based on the United

477 States county in which the HPAI-positive poultry premises was located. Counties were then  
478 categorized by state and whether the county's sequences exclusively originated from turkey  
479 production premises. In contrast to the simplified discrete trait model performed parallel to the  
480 structured coalescent model above, this model enables geographic dispersion of the HPAI virus  
481 to be estimated.

482         The geographic discrete trait diffusion model was extended with a GLM to assess the  
483 impact of environmental covariates on the viral transition rates among county categories. In this  
484 approach, viral diffusion rates among discrete geographic regions act as the outcome to a log-  
485 linear combination of environmental variables, regression coefficients and indicator variables  
486 (17). Environmental and anthropogenic variables were selected based on previous indication of  
487 their importance to avian influenza risk (42). Layer chicken farm density and turkey farm density  
488 were calculated from USDA 2012 census data (<https://quickstats.nass.usda.gov/>) divided by the  
489 land area of the county group. Human population density and proportion of county covered in  
490 water was obtained from United States census data (<https://factfinder.census.gov/>). The  
491 remaining variables were summarized per county group using ArcGIS Pro. Geographic distance  
492 was calculated as the linear distance between county group centroid. Road density was estimated  
493 as the total length of road per county divided by the total county group area. Proportion of county  
494 designated as an important bird area (IBA) was calculated using the publicly available Audubon  
495 Important Bird Areas and Conservation Priorities data (54). Proportion of the county group used  
496 for agriculture (i.e., covered by pasture, hay or cultivated crops) was obtained from the United  
497 States Geological Survey National Land Cover Database created in 2011 and amended in 2014  
498 (55). The number of frozen days was calculated from daily freeze-thaw satellite data from March  
499 1 to June 15, 2015 (56,57). A frozen day was defined as a day in which more than half of the

500 county group area had a temperature measured as below 0 C. All covariate measures were log-  
501 transformed and standardized before inclusion in the GLM.

502 The discrete trait diffusion models were applied to the empirical distribution of  
503 phylogenetic trees from the best fitting evolutionary model. For each diffusion model, three  
504 independent MCMC runs of 1 million steps in length were performed, sampling every 100 steps.  
505 Convergence was assessed in Tracer v1.5, ensuring ESS > 200 for each estimated parameter.  
506 Removing the first 10% of each run as burn-in and re-sampling every 300 steps, log and tree files  
507 were combined using LogCombiner in the BEAST v1.10 software suite. Statistical support for  
508 transition rates in the discrete trait diffusion model and the covariate coefficients of the GLM  
509 were inferred using Bayesian stochastic search variable selection (BSSVS). Briefly, for each  
510 estimated parameter, an indicator variable (I) is stochastically turned on (I = 1) or off (I = 0) at  
511 each step of the MCMC (16,53). The posterior distribution of indicator values can be used to  
512 calculate a Bayes factor (BF), indicating the level of statistical support for the inclusion of that  
513 parameter in the model. BF support was defined in the following categories: no support (BF <  
514 3.0), substantial support ( $3.0 \leq \text{BF} < 10.0$ ), strong support ( $10.0 \leq \text{BF} < 30.0$ ), very strong  
515 support ( $30.0 \leq \text{BF} < 100.0$ ), and decisive support ( $\text{BF} \geq 100.0$ ). Median transition rates, median  
516 conditional coefficients, 95% highest posterior density (HPD) and BF were calculated using  
517 personalized Python scripts.

## 518 ACKNOWLEDGEMENTS

519 We would like to thank Alex Heri for her critical review of this manuscript.

## 520 REFERENCES

- 521 1. Lee YJ, Kang HM, Lee EK, Song BM, Jeong J, Kwon YK, et al. Novel reassortant  
522 influenza A(H5N8) viruses, South Korea, 2014. *Emerg Infect Dis.* 2014 Jun;20(6):1087–



- 523 9.
- 524 2. Dalby AR, Iqbal M. The European and Japanese outbreaks of H5N8 derive from a single  
525 source population providing evidence for the dispersal along the long distance bird  
526 migratory flyways [Internet]. Vol. 3, PeerJ. 2015. p. e934. Available from:  
527 <https://www.ncbi.nlm.nih.gov/pubmed/25945320>
- 528 3. Harder T, Maurer-Stroh S, Pohlmann A, Starick E, Höreth-Böntgen D, Albrecht K, et al.  
529 Influenza A(H5N8) Virus Similar to Strain in Korea Causing Highly Pathogenic Avian  
530 Influenza in Germany. *Emerg Infect Dis* [Internet]. 2015 May;21(5):860–3. Available  
531 from: <https://www.ncbi.nlm.nih.gov/pubmed/25897703>
- 532 4. Ip HS, Torchetti MK, Crespo R, Kohrs P, DeBruyn P, Mansfield KG, et al. Novel  
533 Eurasian highly pathogenic avian influenza A H5 viruses in wild birds, Washington, USA,  
534 2014. *Emerg Infect Dis*. 2015 May;21(5):886–90.
- 535 5. Pasick J, Berhane Y, Joseph T, Bowes V, Hisanaga T, Handel K, et al. Reassortant highly  
536 pathogenic influenza A H5N2 virus containing gene segments related to Eurasian H5N8 in  
537 British Columbia, Canada, 2014. *Sci Rep*. 2015 Mar;5:9484.
- 538 6. Lee DH, Bahl J, Torchetti MK, Killian ML, Ip HS, DeLiberto TJ, et al. Highly Pathogenic  
539 Avian Influenza Viruses and Generation of Novel Reassortants, United States, 2014-2015.  
540 *Emerg Infect Dis*. 2016 Jul;22(7):1283–5.
- 541 7. APHIS U. Final Report for the 2014–2015 Outbreak of Highly Pathogenic Avian  
542 Influenza (HPAI) in the United States. 2016 Aug.
- 543 8. Johansson RC, Preston WP, Seitzinger AH. Government Spending to Control Highly  
544 Pathogenic Avian Influenza. *Choices*. 2016 Jan;31(2).
- 545 9. Swayne DE, Hill RE, Clifford J. Safe application of regionalization for trade in poultry

- 546 and poultry products during highly pathogenic avian influenza outbreaks in the USA.
- 547 Avian Pathol [Internet]. Taylor & Francis; 2017 Mar 4 [cited 2019 Apr 23];46(2):125–30.
- 548 Available from: <https://www.tandfonline.com/doi/full/10.1080/03079457.2016.1257775>
- 549 10. Dargatz D, Beam A, Wainwright S, McCluskey B. Case Series of Turkey Farms from the
- 550 H5N2 Highly Pathogenic Avian Influenza Outbreak in the United States During 2015.
- 551 Avian Dis. 2016 Jun;60(2):467–72.
- 552 11. Wells SJ, Kromm MM, VanBeusekom ET, Sorley EJ, Sundaram ME, VanderWaal K, et
- 553 al. Epidemiologic Investigation of Highly Pathogenic H5N2 Avian Influenza Among
- 554 Upper Midwest U.S. Turkey Farms, 2015. Avian Dis. 2017 Jun;61(2):198–204.
- 555 12. Grear DA, Hall JS, Dusek RJ, Ip HS. Inferring epidemiologic dynamics from viral
- 556 evolution: 2014–2015 Eurasian/North American highly pathogenic avian influenza viruses
- 557 exceed transmission threshold,  $R_0 = 1$ , in wild birds and poultry in North America. Evol
- 558 Appl. 2017 Dec;11(4):547–57.
- 559 13. Bonney PJ, Malladi S, Boender GJ, Weaver JT, Ssematimba A, Halvorson DA, et al.
- 560 Spatial transmission of H5N2 highly pathogenic avian influenza between Minnesota
- 561 poultry premises during the 2015 outbreak. PLoS One [Internet]. 2018;13(9):e0204262.
- 562 Available from: <https://www.ncbi.nlm.nih.gov/pubmed/30240402>
- 563 14. Lee D-H, Torchetti MK, Hicks J, Killian ML, Bahl J, Pantin-Jackwood M, et al.
- 564 Transmission dynamics of highly pathogenic avian influenza virus a(H5Nx) clade 2.3.4.4,
- 565 North America, 2014–2015. Emerg Infect Dis. 2018;24(10).
- 566 15. USDA APHIS. Epidemiologic and Other Analyses of HPAI-Affected Poultry Flocks:
- 567 September 9, 2015 Report. 2015.
- 568 16. Lemey P, Rambaut A, Bedford T, Faria N, Bielejec F, Baele G, et al. Unifying Viral

- 569 Genetics and Human Transportation Data to Predict the Global Transmission Dynamics of  
570 Human Influenza H3N2. PLOS Pathog [Internet]. 2014;10(2):e1003932. Available from:  
571 <http://dx.doi.org/10.1371/journal.ppat.1003932>
- 572 17. Baele G, A. MS, Rambaut A, Lemey P. Emerging Concepts of Data Integration in  
573 Pathogen Phylodynamics. Syst Biol. 2016;66(1):e65.
- 574 18. Volz EM, Siveroni I. Bayesian phylodynamic inference with complex models. PLoS  
575 Comput Biol [Internet]. 2018 Nov;14(11):e1006546. Available from:  
576 <https://www.ncbi.nlm.nih.gov/pubmed/30422979>
- 577 19. Dudas G, Carvalho LM, Rambaut A, Bedford T. MERS-CoV spillover at the camel-  
578 human interface. Vol. 7, eLife. 2018.
- 579 20. Drummond AJ, Nicholls GK, Rodrigo AG, Solomon W. Estimating Mutation Parameters,  
580 Population History and Genealogy Simultaneously From Temporally Spaced Sequence  
581 Data. Genetics [Internet]. 2002;161(3):1307–20. Available from:  
582 [http://tmlibrary.summon.serialssolutions.com/2.0.0/link/0/eLvHCXMwnV1NS\\_QwEB5](http://tmlibrary.summon.serialssolutions.com/2.0.0/link/0/eLvHCXMwnV1NS_QwEB5)  
583 UELyIr5-  
584 rr5CTJ3fpZ5IePMiiiDdB0Vto86HCtrvY7mH99c6kqbwrnt5j27S0mcxknuTpMwBpMonG  
585 P2JCjIhIW5zbrEuESbRx2qtNSWe4kYZw4\_Q6nb7kD\_fieQMGFhmRLNeoipPm\_c3TLU  
586 O\_fvh6axNHuJFOmSv0fJy15EU3n8-uFrW\_
- 587 21. Dearlove B, Wilson DJ. Coalescent inference for infectious disease: meta-analysis of  
588 hepatitis C. Philos Trans R Soc Lond B Biol Sci [Internet]. 2013 Mar 19 [cited 2019 Apr  
589 15];368(1614):20120314. Available from:  
590 <http://rstb.royalsocietypublishing.org/cgi/doi/10.1098/rstb.2012.0314>
- 591 22. Biek R, Drummond AJ, Poss M. A virus reveals population structure and recent

- 592 demographic history of its carnivore host. *Science*. 2006 Jan;311(5760):538–41.
- 593 23. Möller S, du Plessis L, Stadler T. Impact of the tree prior on estimating clock rates during  
594 epidemic outbreaks. *Proc Natl Acad Sci [Internet]*. 2018;115(16):4200–5. Available from:  
595 <http://www.pnas.org/content/115/16/4200.abstract>
- 596 24. Streicker DG, Altizer SM, Velasco-Villa A, Rupprecht CE. Variable evolutionary routes  
597 to host establishment across repeated rabies virus host shifts among bats. *Proc Natl Acad*  
598 *Sci U S A [Internet]*. 2012 Nov 27 [cited 2019 Apr 15];109(48):19715–20. Available  
599 from: <http://www.pnas.org/cgi/doi/10.1073/pnas.1203456109>
- 600 25. Vaughan TG, Kühnert D, Poppinga A, Welch D, Drummond AJ. Efficient Bayesian  
601 inference under the structured coalescent. *Bioinformatics [Internet]*. 2014 Aug 15 [cited  
602 2019 Feb 11];30(16):2272–9. Available from:  
603 <http://www.ncbi.nlm.nih.gov/pubmed/24753484>
- 604 26. Aldunate F, Gámbaro F, Fajardo A, Soñora M, Cristina J. Evidence of increasing  
605 diversification of Zika virus strains isolated in the American continent. *J Med Virol*  
606 *[Internet]*. John Wiley & Sons, Ltd; 2017 Dec 1 [cited 2019 Apr 15];89(12):2059–63.  
607 Available from: <http://doi.wiley.com/10.1002/jmv.24910>
- 608 27. Alkhamis MA, Perez AM, Murtaugh MP, Wang X, Morrison RB. Applications of  
609 Bayesian Phylodynamic Methods in a Recent U.S. Porcine Reproductive and Respiratory  
610 Syndrome Virus Outbreak. *Front Microbiol [Internet]*. 2016 Feb 2 [cited 2019 Apr  
611 15];7:67. Available from: <http://www.ncbi.nlm.nih.gov/pubmed/26870024>
- 612 28. Carrington CVF, Foster JE, Pybus OG, Bennett SN, Holmes EC. Invasion and  
613 Maintenance of Dengue Virus Type 2 and Type 4 in the Americas. *J Virol [Internet]*. 2005  
614 Dec 1 [cited 2019 Apr 15];79(23):14680–7. Available from:

- 615 <http://www.ncbi.nlm.nih.gov/pubmed/16282468>
- 616 29. Drummond AJ, Rambaut A, Shapiro B, Pybus OG. Bayesian coalescent inference of past  
617 population dynamics from molecular sequences [Internet]. Vol. 22, Molecular biology and  
618 evolution. 2005. p. 1185–92. Available from:  
619 <https://www.ncbi.nlm.nih.gov/pubmed/15703244>
- 620 30. Minin VN, Bloomquist EW, Suchard MA. Smooth skyride through a rough skyline:  
621 Bayesian coalescent-based inference of population dynamics. *Mol Biol Evol.* 2008  
622 Jul;25(7):1459–71.
- 623 31. Heled J, Drummond AJ. Bayesian inference of population size history from multiple loci.  
624 *BMC Evol Biol* [Internet]. BioMed Central; 2008 Oct 23 [cited 2019 Feb 11];8(1):289.  
625 Available from: <http://bmcevolbiol.biomedcentral.com/articles/10.1186/1471-2148-8-289>
- 626 32. Heller R, Chikhi L, Siegmund HR. The Confounding Effect of Population Structure on  
627 Bayesian Skyline Plot Inferences of Demographic History. Mailund T, editor. *PLoS One*  
628 [Internet]. Public Library of Science; 2013 May 7 [cited 2019 Apr 14];8(5):e62992.  
629 Available from: <https://dx.plos.org/10.1371/journal.pone.0062992>
- 630 33. Lee DH, Bertran K, Kwon JH, Swayne DE. Evolution, global spread, and pathogenicity of  
631 highly pathogenic avian influenza H5Nx clade 2.3.4.4. *J Vet Sci.* 2017 Aug;18(S1):269–  
632 80.
- 633 34. Lu L, Brown AJL, Lycett SJ. Quantifying predictors for the spatial diffusion of avian  
634 influenza virus in China. *BMC Evol Biol* [Internet]. 2017;17(1):16. Available from:  
635 <https://doi.org/10.1186/s12862-016-0845-3>
- 636 35. Magee D, Beard R, Suchard MA, Lemey P, Scotch M. Combining phylogeography and  
637 spatial epidemiology to uncover predictors of H5N1 influenza A virus diffusion. *Arch*

- 638 Virol. Austria; 2015 Jan;160(1):215–24.
- 639 36. Loth L, Gilbert M, Osmani MG, Kalam AM, Xiao X. Risk factors and clusters of Highly  
640 Pathogenic Avian Influenza H5N1 outbreaks in Bangladesh. *Prev Vet Med* [Internet].  
641 NIH Public Access; 2010 Aug 1 [cited 2019 Mar 26];96(1–2):104–13. Available from:  
642 <http://www.ncbi.nlm.nih.gov/pubmed/20554337>
- 643 37. Paul M, Tavoranpanich S, Abrial D, Gasqui P, Charras-Garrido M, Thanapongtharm W, et  
644 al. Anthropogenic factors and the risk of highly pathogenic avian influenza H5N1:  
645 prospects from a spatial-based model. *Vet Res* [Internet]. BioMed Central; 2010 [cited  
646 2019 Mar 26];41(3):28. Available from: <http://www.ncbi.nlm.nih.gov/pubmed/20003910>
- 647 38. Ward MP, Maftai D, Apostu C, Suru A. Environmental and anthropogenic risk factors for  
648 highly pathogenic avian influenza subtype H5N1 outbreaks in Romania, 2005--2006. *Vet*  
649 *Res Commun* [Internet]. 2008 Dec 5 [cited 2019 Mar 26];32(8):627–34. Available from:  
650 <http://link.springer.com/10.1007/s11259-008-9064-8>
- 651 39. Loth L, Gilbert M, Wu J, Czarnecki C, Hidayat M, Xiao X. Identifying risk factors of  
652 highly pathogenic avian influenza (H5N1 subtype) in Indonesia. *Prev Vet Med* [Internet].  
653 2011 Oct 1 [cited 2019 Mar 26];102(1):50–8. Available from:  
654 <https://linkinghub.elsevier.com/retrieve/pii/S016758771100208X>
- 655 40. Yupiana Y, de Vlas SJ, Adnan NM, Richardus JH. Risk factors of poultry outbreaks and  
656 human cases of H5N1 avian influenza virus infection in West Java Province, Indonesia.  
657 *Int J Infect Dis* [Internet]. 2010 Sep [cited 2019 Mar 26];14(9):e800–5. Available from:  
658 <https://linkinghub.elsevier.com/retrieve/pii/S1201971210024070>
- 659 41. Rivas AL, Chowell G, Schwager SJ, Fasina FO, Hoogesteijn AL, Smith SD, et al. Lessons  
660 from Nigeria: the role of roads in the geo-temporal progression of avian influenza (H5N1)

- 661 virus. *Epidemiol Infect* [Internet]. Cambridge University Press; 2010 Feb 5 [cited 2019  
662 Mar 27];138(02):192. Available from:  
663 [http://www.journals.cambridge.org/abstract\\_S0950268809990495](http://www.journals.cambridge.org/abstract_S0950268809990495)
- 664 42. Gilbert M, Pfeiffer DU. Risk factor modelling of the spatio-temporal patterns of highly  
665 pathogenic avian influenza (HPAIV) H5N1: A review. *Spat Spatiotemporal Epidemiol*  
666 [Internet]. 2012 Sep;3(3):173–83. Available from:  
667 <https://www.sciencedirect.com/science/article/pii/S1877584512000032>
- 668 43. Martin V, Pfeiffer DU, Zhou X, Xiao X, Prosser DJ, Guo F, et al. Spatial distribution and  
669 risk factors of highly pathogenic avian influenza (HPAI) H5N1 in China [Internet]. Vol. 7,  
670 *PLoS Pathogens*. 2011. p. e1001308. Available from:  
671 <https://www.ncbi.nlm.nih.gov/pubmed/21408202>
- 672 44. Bertran K, Lee D-H, Balzli C, Pantin-Jackwood MJ, Spackman E, Swayne DE. Age is not  
673 a determinant factor in susceptibility of broilers to H5N2 clade 2.3.4.4 high pathogenicity  
674 avian influenza virus. *Vet Res* [Internet]. BioMed Central; 2016 Dec 21 [cited 2019 Apr  
675 25];47(1):116. Available from:  
676 <http://veterinaryresearch.biomedcentral.com/articles/10.1186/s13567-016-0401-6>
- 677 45. Bouckaert R, Heled J, Kühnert D, Vaughan T, Wu C-H, Xie D, et al. BEAST 2: a  
678 software platform for Bayesian evolutionary analysis. *PLoS Comput Biol* [Internet].  
679 2014;10(4):e1003537. Available from: <https://www.ncbi.nlm.nih.gov/pubmed/24722319>
- 680 46. Kalyaanamoorthy S, Minh BQ, Wong TKF, von Haeseler A, Jermini LS. ModelFinder:  
681 fast model selection for accurate phylogenetic estimates. *Nat Methods*. 2017  
682 Jun;14(6):587–9.
- 683 47. Kimura M. Estimation of evolutionary distances between homologous nucleotide

- 684 sequences. Proc Natl Acad Sci U S A [Internet]. National Academy of Sciences; 1981 Jan  
685 1 [cited 2019 Feb 11];78(1):454–8. Available from:  
686 <http://www.ncbi.nlm.nih.gov/pubmed/6165991>
- 687 48. Yang Z. Maximum likelihood phylogenetic estimation from DNA sequences with variable  
688 rates over sites: Approximate methods. J Mol Evol [Internet]. Springer-Verlag; 1994 Sep  
689 [cited 2019 Feb 11];39(3):306–14. Available from:  
690 <http://link.springer.com/10.1007/BF00160154>
- 691 49. Lartillot N, Philippe H. Computing Bayes Factors Using Thermodynamic Integration. Syst  
692 Biol [Internet]. 2006 Apr;55(2):195–207. Available from:  
693 <https://www.jstor.org/stable/20142916>
- 694 50. Kass RE, Raftery AE. Bayes Factors. J Am Stat Assoc [Internet]. 1995 Jun;90(430):773–  
695 95. Available from: <https://www.jstor.org/stable/2291091>
- 696 51. Raftery AE, Newton M, Satagopan J, Krivitsky P, Raftery G. Estimating the integrated  
697 likelihood via posterior simulation using the harmonic mean identity [Internet]. 2007  
698 [cited 2019 Feb 11]. Available from:  
699 <https://www.scienceopen.com/document?vid=ba5eccc7-2c10-4ec4-b8aa-319939c45f1b>
- 700 52. Suchard MA, Lemey P, Baele G, Ayres DL, Drummond AJ, Rambaut A. Bayesian  
701 phylogenetic and phylodynamic data integration using BEAST 1.10. Virus Evol [Internet].  
702 2018;4(1):vey016. Available from: <https://www.ncbi.nlm.nih.gov/pubmed/29942656>
- 703 53. Lemey P, Rambaut A, Drummond AJ, Suchard MA. Bayesian phylogeography finds its  
704 roots. PLoS Comput Biol [Internet]. 2009 Sep;5(9):e1000520. Available from:  
705 <http://www.ncbi.nlm.nih.gov/pubmed/19779555>
- 706 54. National Audubon Society. Important Bird Areas Database, Boundary Digital Data Set.



- 707            2018.
- 708    55.    U.S. Geological Survey. NLCD 2011 Land Cover (2011 Edition, amended 2014)
- 709            [Internet]. U.S. Geological Survey; 2014. Available from:
- 710            <https://www.sciencebase.gov/catalog/item/5a1c31b9e4b09fc93dd63982>
- 711    56.    Kim Y, Kimball JS, Glassy J, McDonald KC. No TitleMEaSURES Northern Hemisphere
- 712            Polar EASE-Grid 2.0 Daily 6 km Land Freeze/Thaw Status from AMSR-E and AMSR2,
- 713            Version 1. Boulder, Colorado USA: NASA National Snow and Ice Data Center
- 714            Distributed Active Archive Center; 2018.
- 715    57.    Kim Y, Kimball JS, Glassy J, Du J. An extended global Earth system data record on daily
- 716            landscape freeze–thaw status determined from satellite passive microwave remote sensing.
- 717            Earth Syst Sci Data [Internet]. 2017 Feb 16 [cited 2019 Mar 25];9(1):133–47. Available
- 718            from: <https://www.earth-syst-sci-data.net/9/133/2017/>
- 719
- 720

721 SUPPLEMENTAL MATERIAL CAPTIONS

722 Table S1. Estimates of viral transmission between poultry industries during the 2015 highly  
723 pathogenic avian influenza virus H5N2 outbreak within the midwestern United States.

724 Table S2. Akaike's information criteria for Markov chain Monte Carlo (AICM) for the  
725 epidemiological compartment-based coalescent models.

726 Table S3. Discrete trait diffusion matrix of the midwestern highly pathogenic avian influenza  
727 (HPAI) H5N2 outbreak, 2015. Median rates and associated 95% highest posterior density  
728 intervals (in brackets) are presented in each cell. The diffusion model is asymmetrical, and  
729 therefore, rates have directionality from a source county group (indicated on the left) to a  
730 sink county group (indicated across the top). County groups were defined by state (IA -  
731 Iowa, MN - Minnesota, ND - North Dakota, NE - Nebraska, SD - South Dakota, WI -  
732 Wisconsin) and composition of poultry type (T - turkey exclusive, CM - layer chicken  
733 exclusive and mixed poultry). Rates are colored by the level of Bayes factor support. Gray  
734 rates represent no support.

735 Table S4. Generalized linear model (GLM) conditional effect sizes and statistical support for  
736 agricultural and geographic covariates of the dispersal of highly pathogenic avian  
737 influenza (HPAI) H5N2 among midwestern county groups. Conditional effect size and  
738 95% highest posterior density (HPD) were calculated based on the estimated GLM  
739 coefficients given the Bayesian stochastic search variable selection (BSSVS) indicator =  
740 1. The posterior probability (PP) refers to the proportion of Markov chain Monte Carlo  
741 (MCMC) samples in which the BSSVS indicator = 1. Bayes factor (BF) > 3.0 indicates  
742 statistical support for the inclusion of the covariate within the GLM.

743 Table S5. Accession number and names of 182 included HPAI H5N2 full genome sequences.

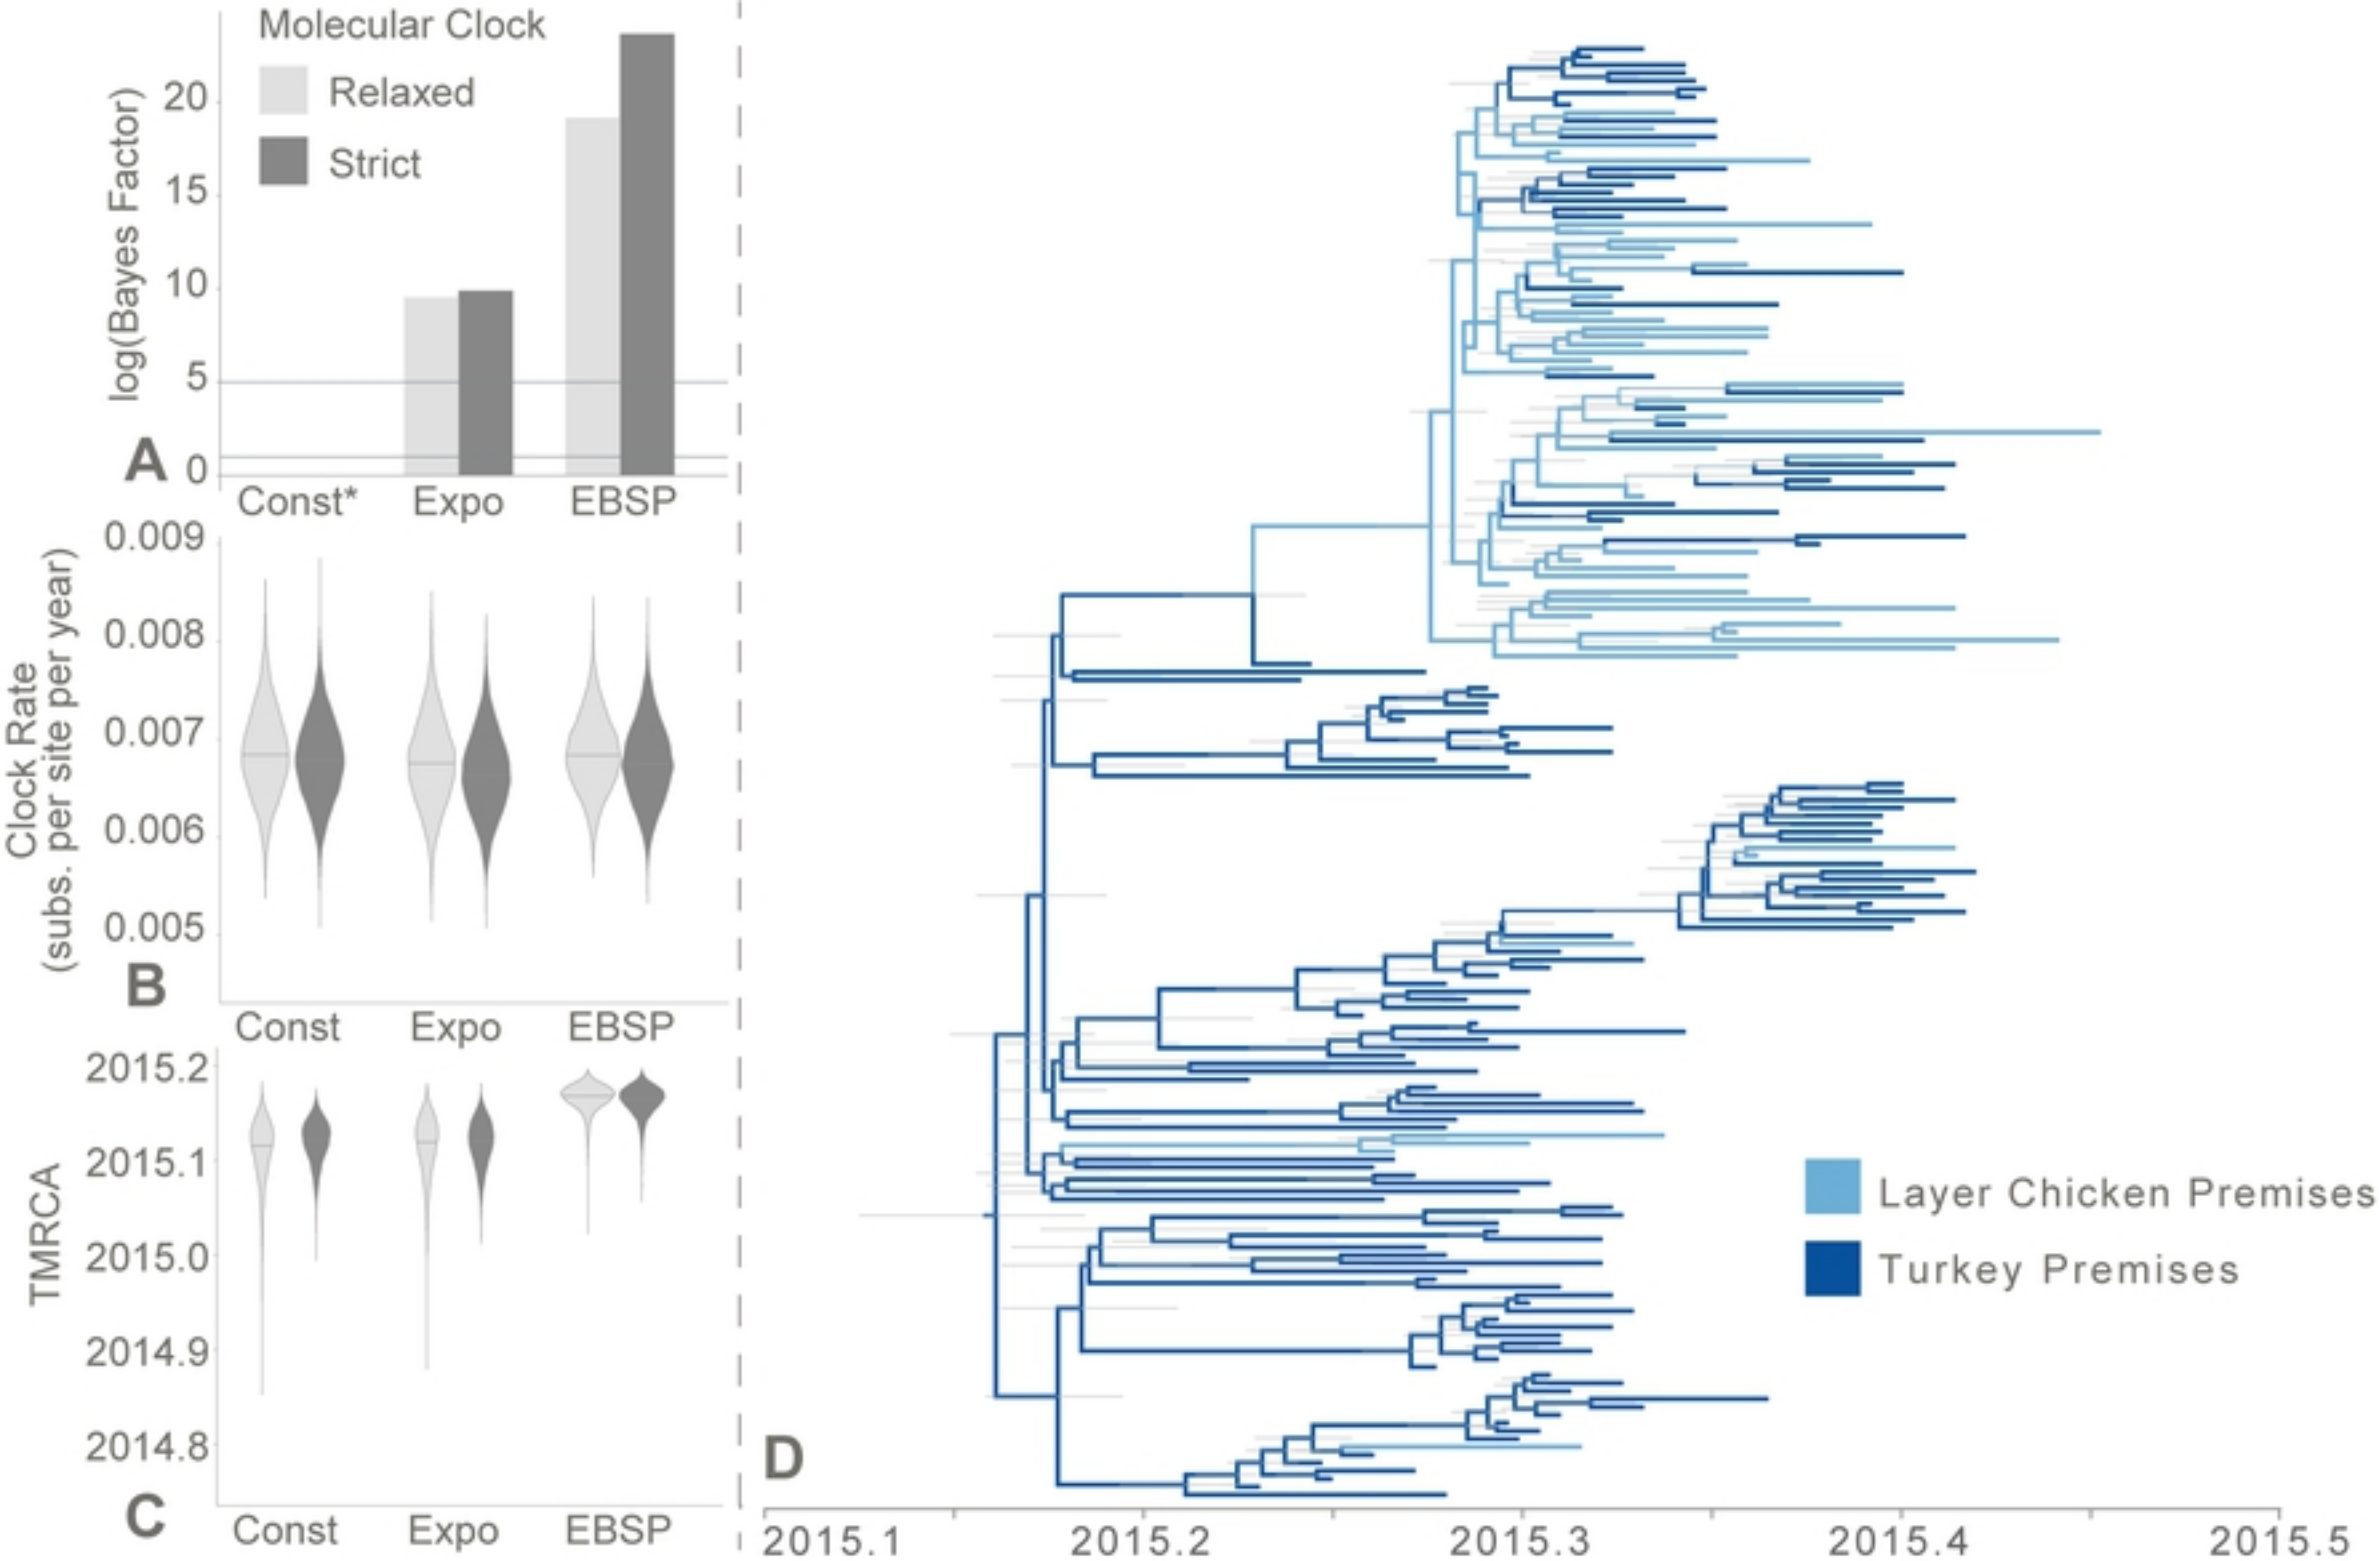

Figure 1

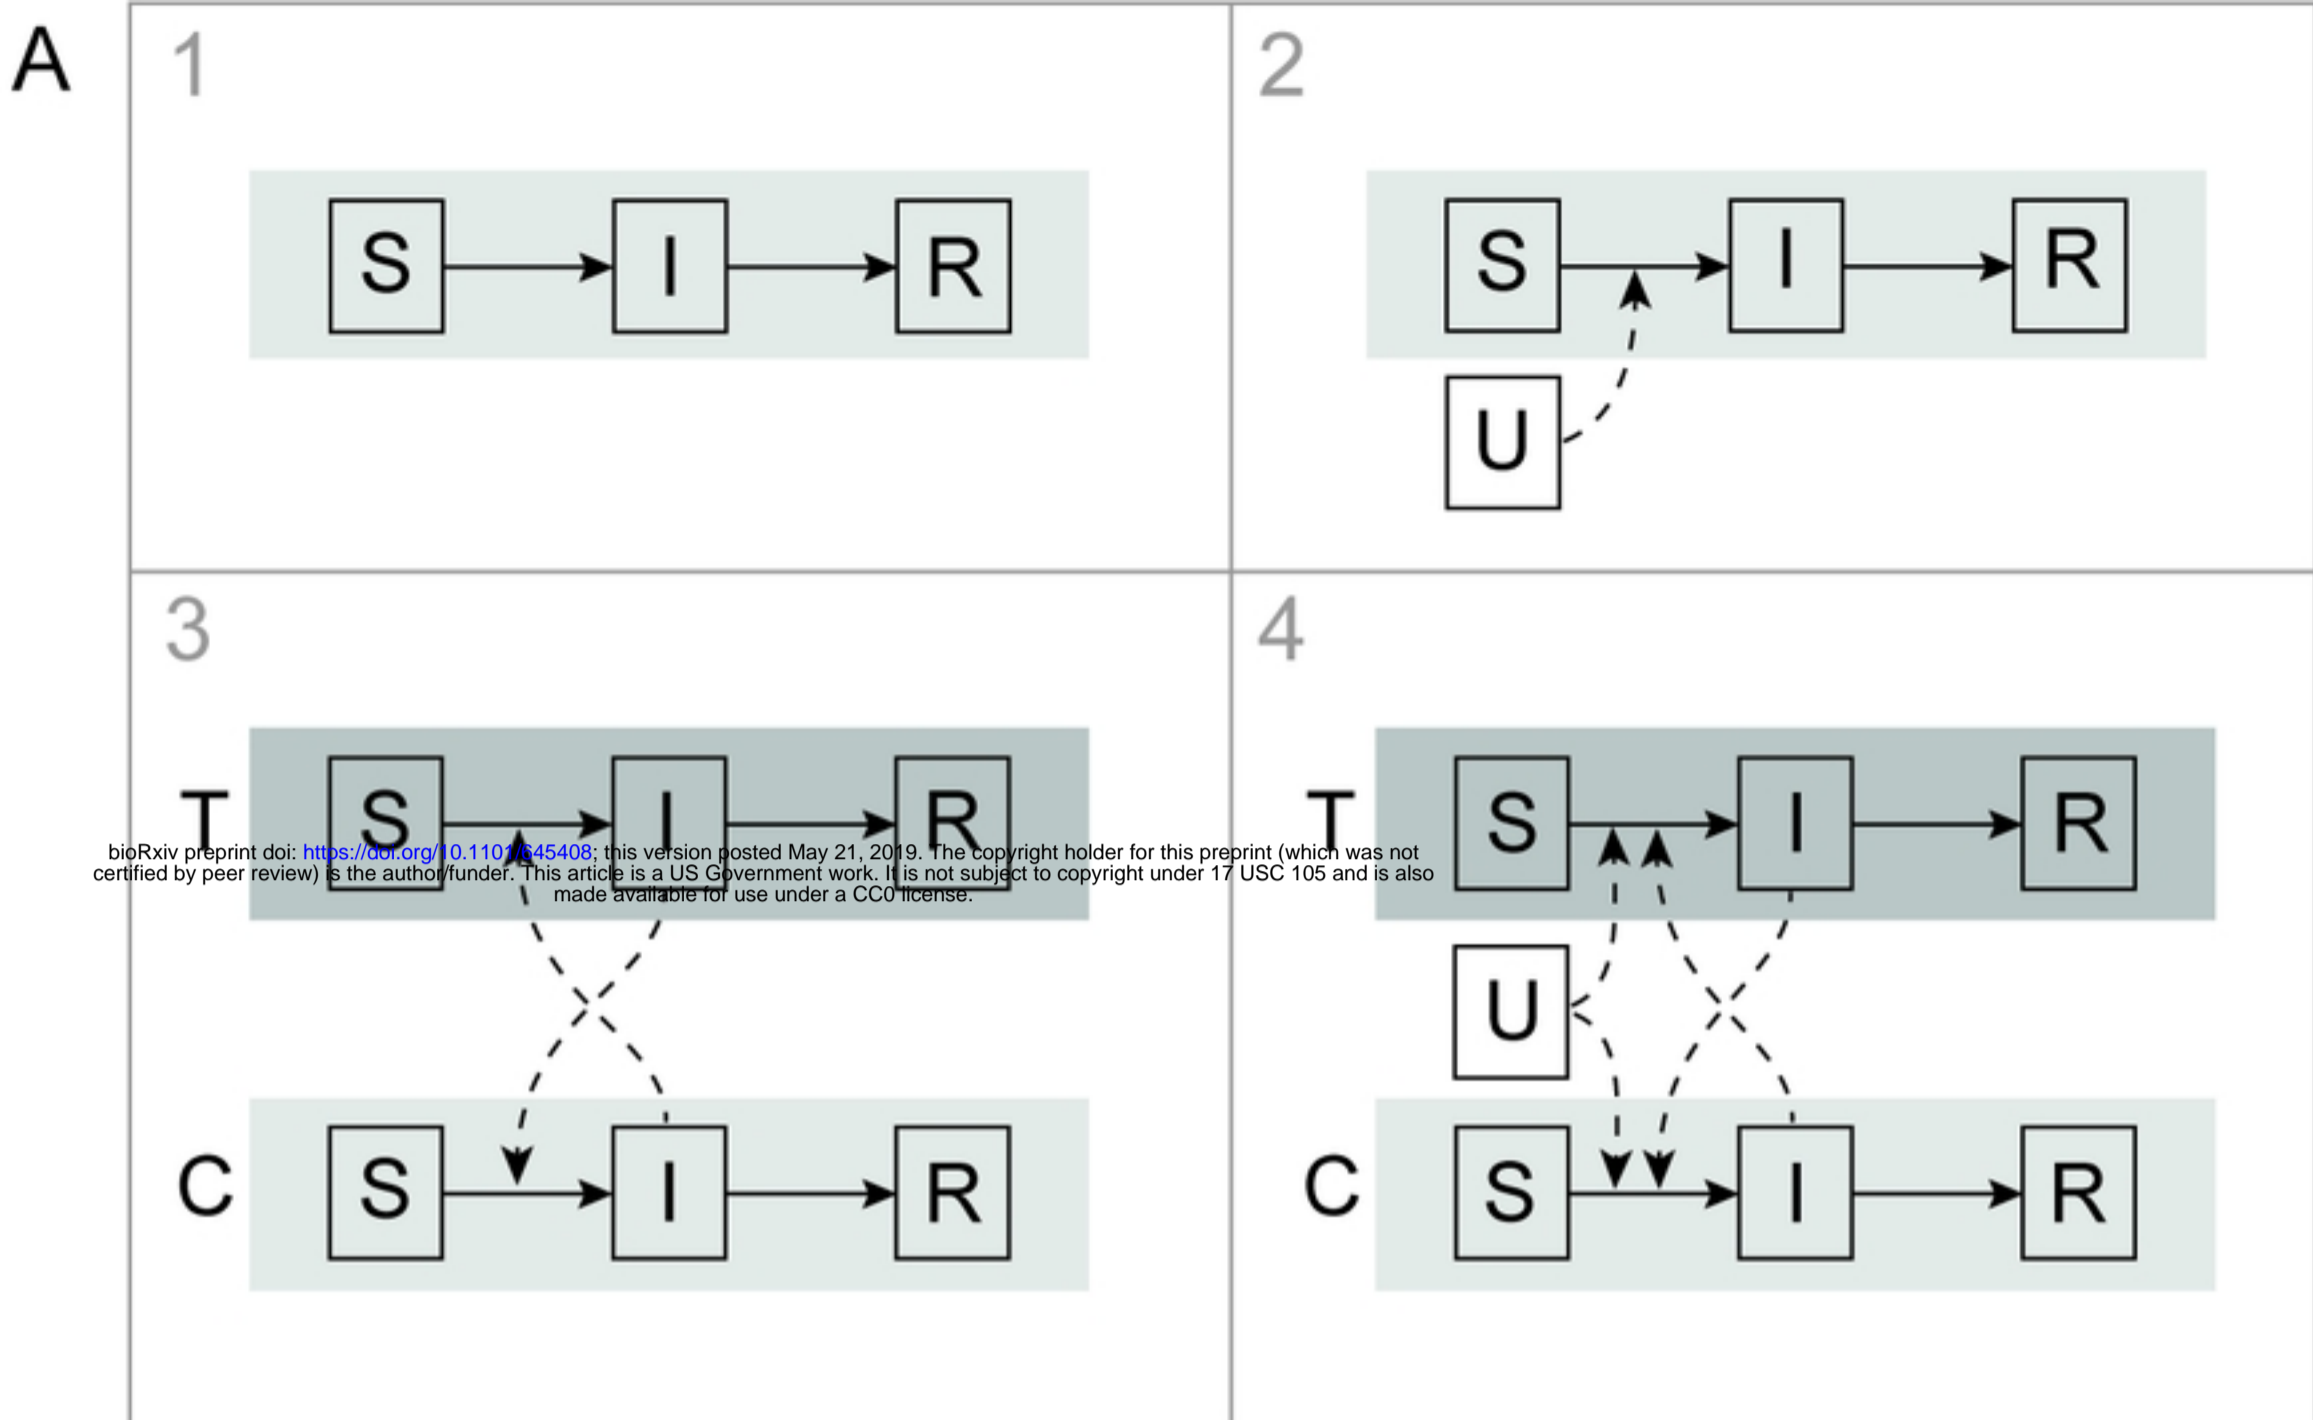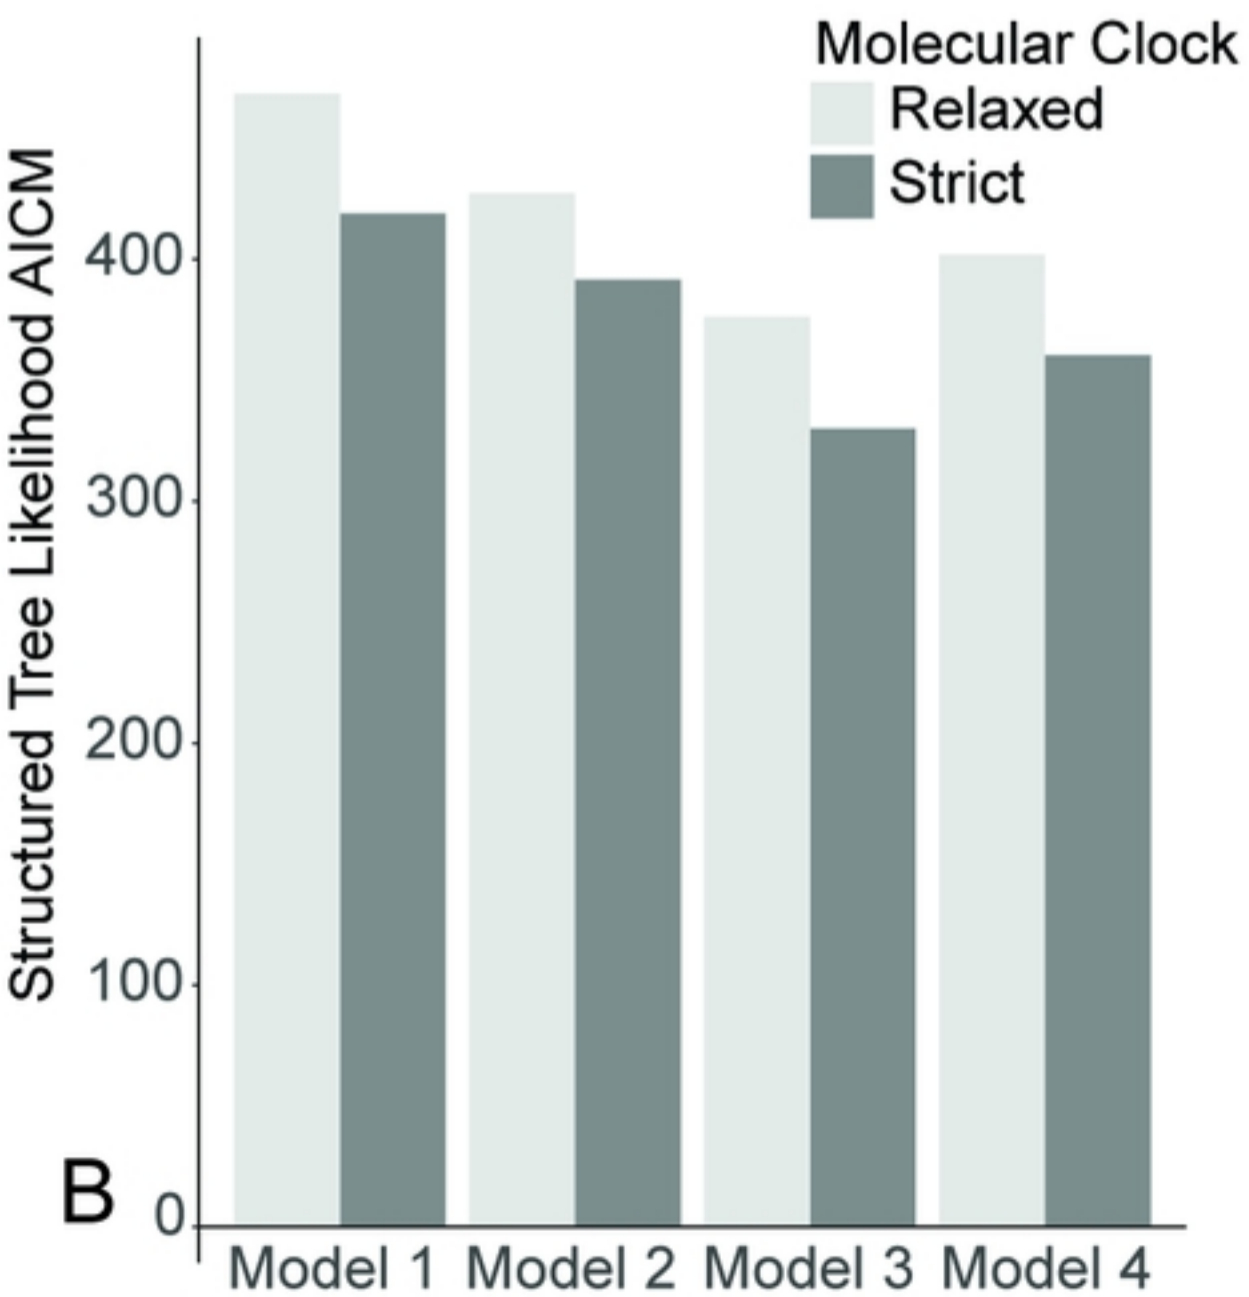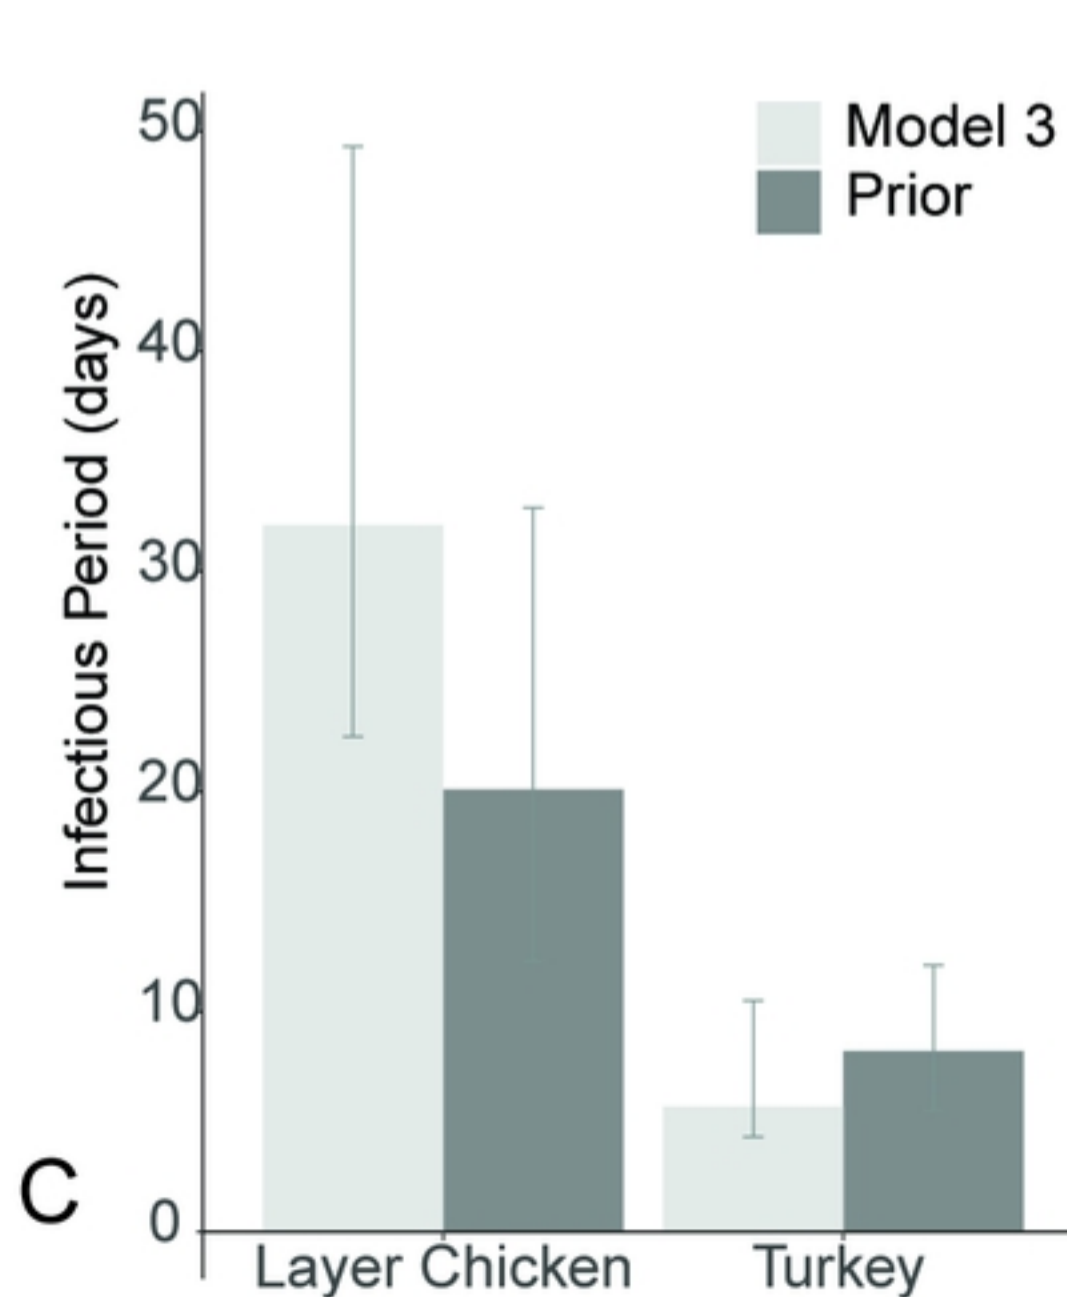

Figure 2

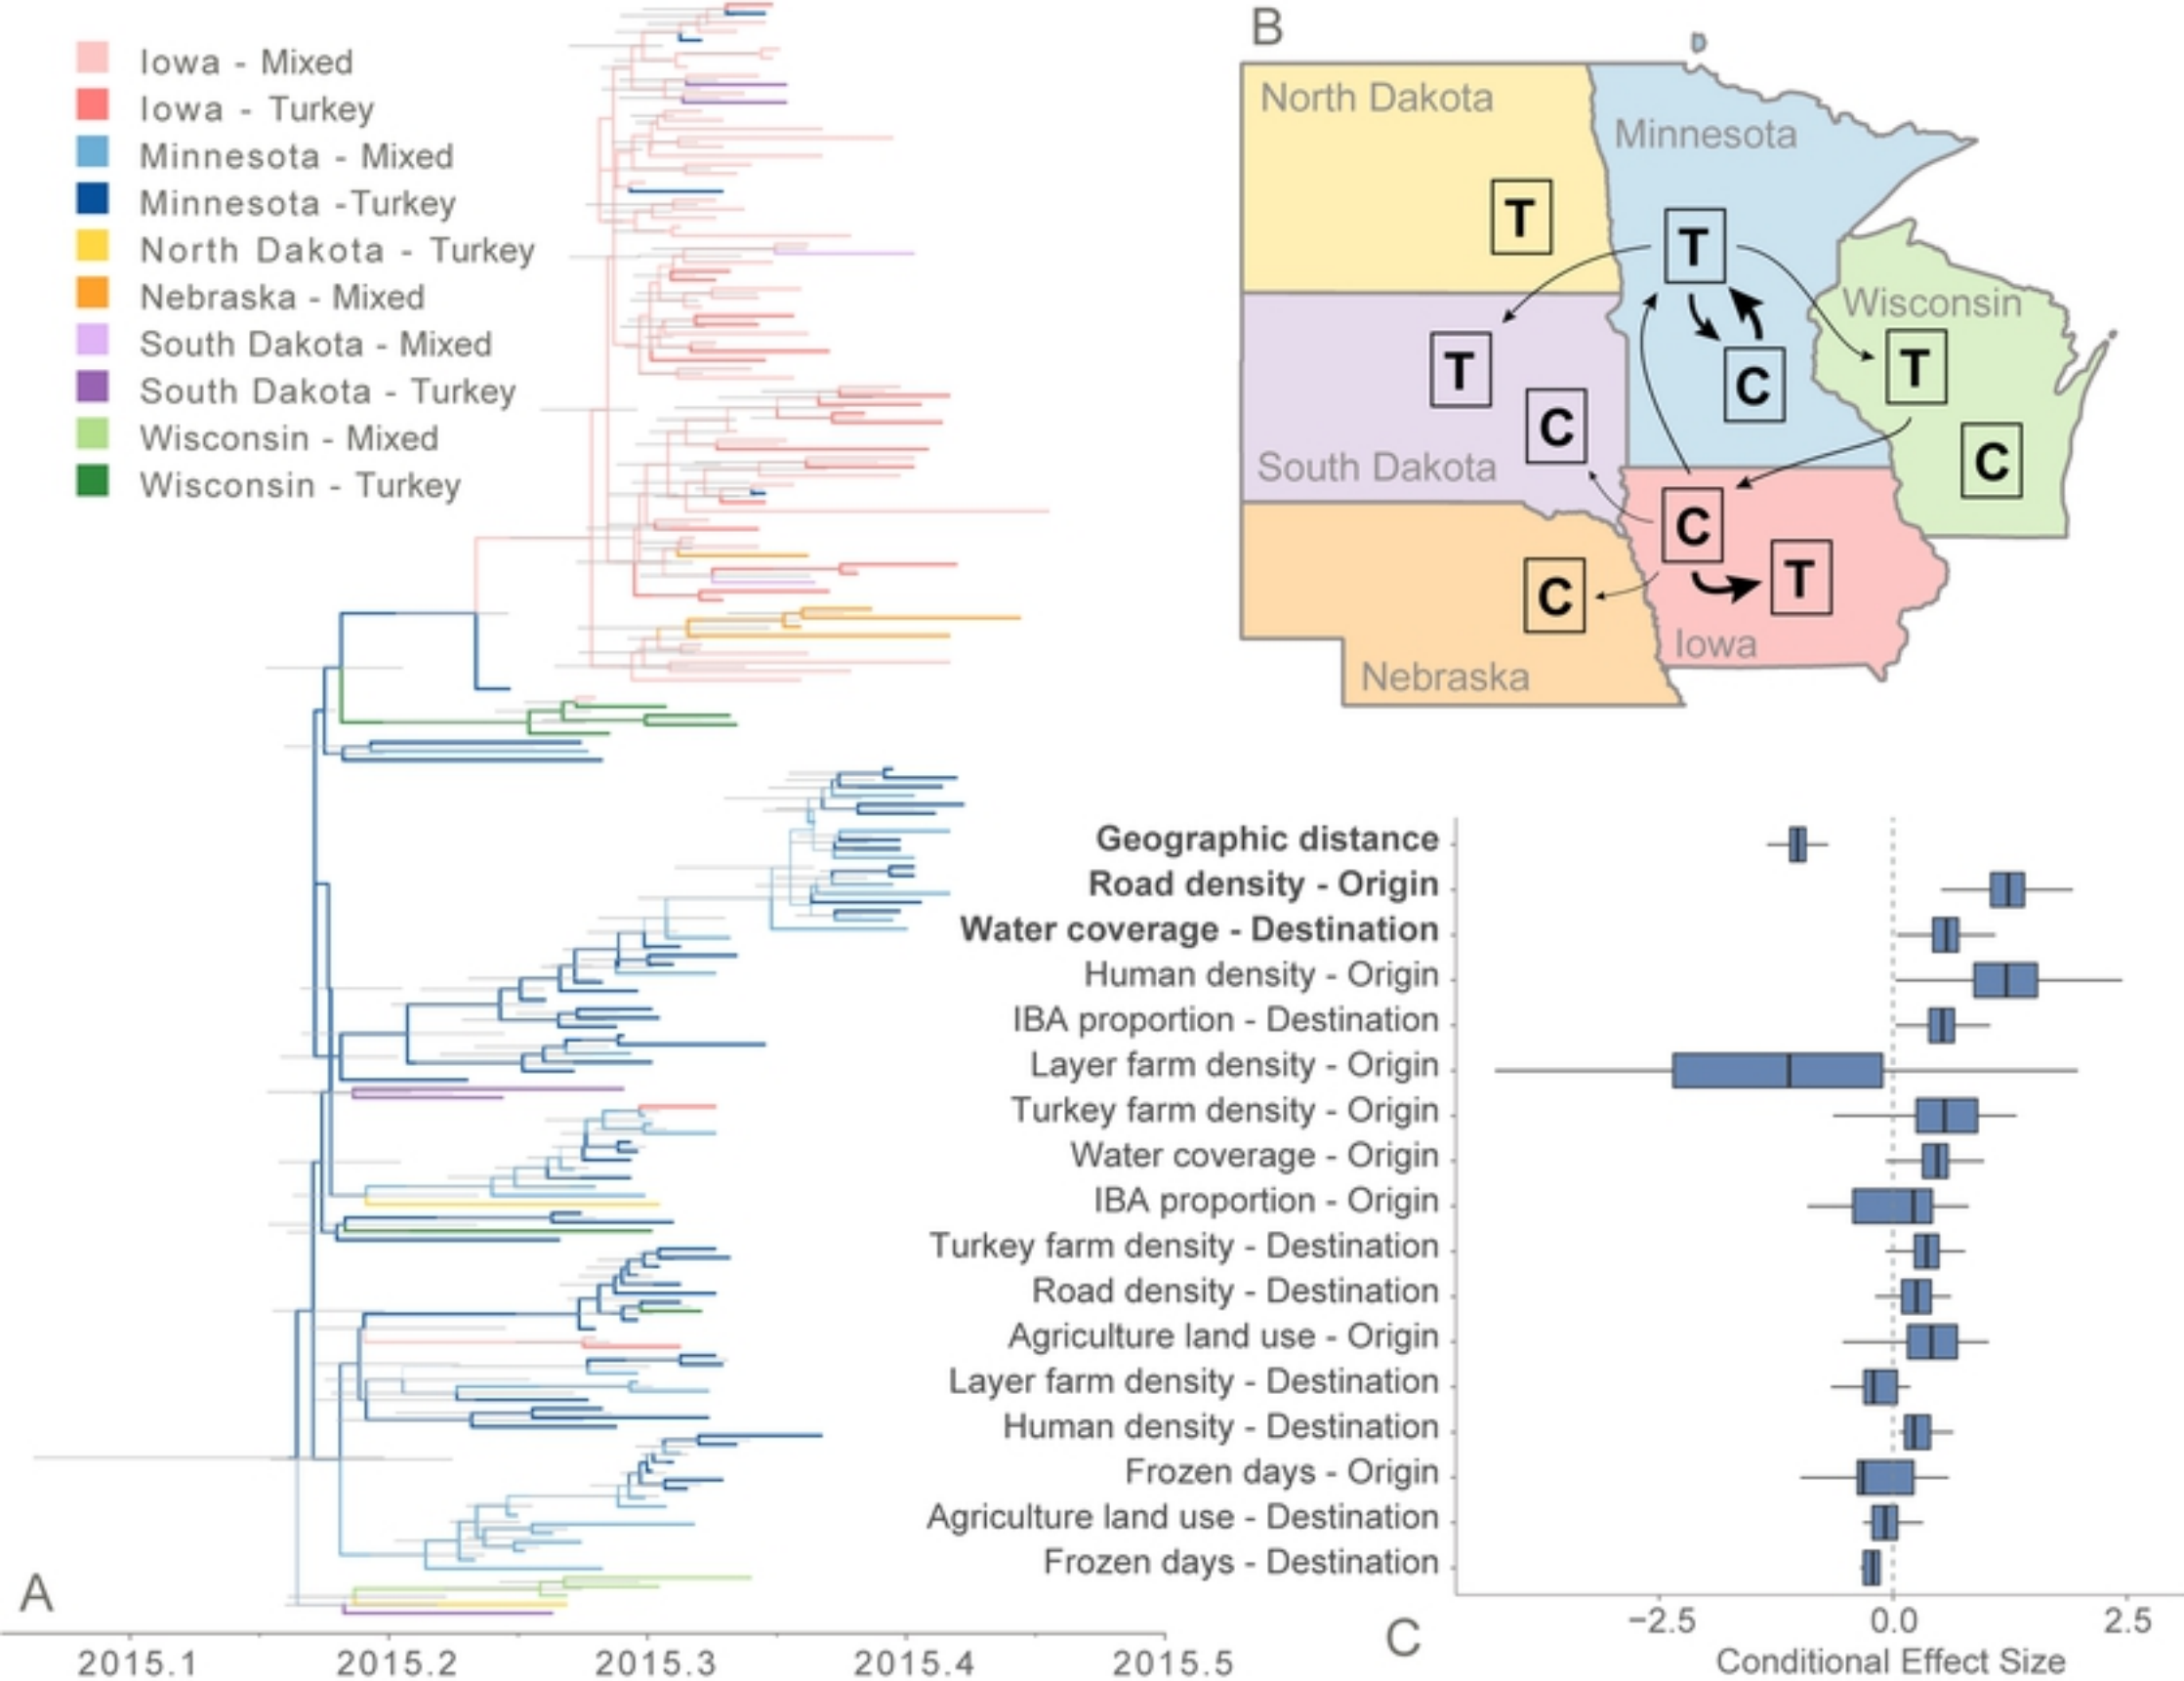

Figure 3
